# Supplementary material for: Simplified Method to Predict Mutual Interactions of Human Transcription Factors Based on Their Primary Structure
Source: PLoS One. 2011 Jul 5;6(7):e21887. doi: 10.1371/journal.pone.0021887 (PMC3130058; doi:10.1371/journal.pone.0021887)
Supplement: Table S1 — 531 Features used for creating the feature vectors. The table shows the 531 features that we used to create the feature vectors representing individual TFs. The individual columns hold the following information: feature number, the identifier of the AAIndex database, authors of Reference, title of reference, journal of reference. (XLS) [file pone.0021887.s001.xls]

## Sheet: features_complete
Feature	AAIndex id	AAIndex Description	Authors	Title	Journal
1	ANDN920101	alpha-CH chemical shifts (Andersen et al., 1992)	Andersen, N.H., Cao, B. and Chen, C.	Peptide/protein structure analysis using the chemical shift index method: upfield alpha-CH values reveal dynamic helices and aL sites	Biochem. and Biophys. Res. Comm. 184, 1008-1014 (1992)
2	ARGP820101	Hydrophobicity index (Argos et al., 1982)	Argos, P., Rao, J.K.M. and Hargrave, P.A.	Structural prediction of membrane-bound proteins	Eur. J. Biochem. 128, 565-575 (1982)
3	ARGP820102	Signal sequence helical potential (Argos et al., 1982)	Argos, P., Rao, J.K.M. and Hargrave, P.A.	Structural prediction of membrane-bound proteins	Eur. J. Biochem. 128, 565-575 (1982)
4	ARGP820103	Membrane-buried preference parameters (Argos et al., 1982)	Argos, P., Rao, J.K.M. and Hargrave, P.A.	Structural prediction of membrane-bound proteins	Eur. J. Biochem. 128, 565-575 (1982)
5	AURR980101	Normalized positional residue frequency at helix termini N4'(Aurora-Rose, 1998)	Aurora, R. and Rose, G.	Helix capping	Protein Science 7, 21-38 (1998)
6	AURR980102	Normalized positional residue frequency at helix termini N"' (Aurora-Rose, 1998)	Aurora, R. and Rose, G.	Helix capping	Protein Science 7, 21-38 (1998)
7	AURR980103	Normalized positional residue frequency at helix termini N" (Aurora-Rose, 1998)	Aurora, R. and Rose, G.	Helix capping	Protein Science 7, 21-38 (1998)
8	AURR980104	Normalized positional residue frequency at helix termini N'(Aurora-Rose, 1998)	Aurora, R. and Rose, G.	Helix capping	Protein Science 7, 21-38 (1998)
9	AURR980105	Normalized positional residue frequency at helix termini Nc (Aurora-Rose, 1998)	Aurora, R. and Rose, G.	Helix capping	Protein Science 7, 21-38 (1998)
10	AURR980106	Normalized positional residue frequency at helix termini N1 (Aurora-Rose, 1998)	Aurora, R. and Rose, G.	Helix capping	Protein Science 7, 21-38 (1998)
11	AURR980107	Normalized positional residue frequency at helix termini N2 (Aurora-Rose, 1998)	Aurora, R. and Rose, G.	Helix capping	Protein Science 7, 21-38 (1998)
12	AURR980108	Normalized positional residue frequency at helix termini N3 (Aurora-Rose, 1998)	Aurora, R. and Rose, G.	Helix capping	Protein Science 7, 21-38 (1998)
13	AURR980109	Normalized positional residue frequency at helix termini N4 (Aurora-Rose, 1998)	Aurora, R. and Rose, G.	Helix capping	Protein Science 7, 21-38 (1998)
14	AURR980110	Normalized positional residue frequency at helix termini N5 (Aurora-Rose, 1998)	Aurora, R. and Rose, G.	Helix capping	Protein Science 7, 21-38 (1998)
15	AURR980111	Normalized positional residue frequency at helix termini C5 (Aurora-Rose, 1998)	Aurora, R. and Rose, G.	Helix capping	Protein Science 7, 21-38 (1998)
16	AURR980112	Normalized positional residue frequency at helix termini C4 (Aurora-Rose, 1998)	Aurora, R. and Rose, G.	Helix capping	Protein Science 7, 21-38 (1998)
17	AURR980113	Normalized positional residue frequency at helix termini C3 (Aurora-Rose, 1998)	Aurora, R. and Rose, G.	Helix capping	Protein Science 7, 21-38 (1998)
18	AURR980114	Normalized positional residue frequency at helix termini C2 (Aurora-Rose, 1998)	Aurora, R. and Rose, G.	Helix capping	Protein Science 7, 21-38 (1998)
19	AURR980115	Normalized positional residue frequency at helix termini C1 (Aurora-Rose, 1998)	Aurora, R. and Rose, G.	Helix capping	Protein Science 7, 21-38 (1998)
20	AURR980116	Normalized positional residue frequency at helix termini Cc (Aurora-Rose, 1998)	Aurora, R. and Rose, G.	Helix capping	Protein Science 7, 21-38 (1998)
21	AURR980117	Normalized positional residue frequency at helix termini C' (Aurora-Rose, 1998)	Aurora, R. and Rose, G.	Helix capping	Protein Science 7, 21-38 (1998)
22	AURR980118	Normalized positional residue frequency at helix termini C" (Aurora-Rose, 1998)	Aurora, R. and Rose, G.	Helix capping	Protein Science 7, 21-38 (1998)
23	AURR980119	Normalized positional residue frequency at helix termini C"' (Aurora-Rose, 1998)	Aurora, R. and Rose, G.	Helix capping	Protein Science 7, 21-38 (1998)
24	AURR980120	Normalized positional residue frequency at helix termini C4' (Aurora-Rose, 1998)	Aurora, R. and Rose, G.	Helix capping	Protein Science 7, 21-38 (1998)
25	BAEK050101	Linker index (Bae et al., 2005)	Bae, K., Mallick, B.K. and Elsik, C.G.	Prediction of protein inter-domain linker regions by a hidden Markov model	Bioinformatics 21, ??-?? (2005)
26	BASU050101	Interactivity scale obtained from the contact matrix (Bastolla et al., 2005)	Bastolla, U., Porto M., Roman H.E. and Vendruscolo M.	Principal eigenvector of contact matrices and hydrophobicity profiles in prote	Proteins 58, 22-30 (2005)
27	BASU050102	Interactivity scale obtained by maximizing the mean of correlation coefficient over single-domain globular proteins (Bastolla et al., 2005)	Bastolla, U., Porto M., Roman H.E. and Vendruscolo M.	Principal eigenvector of contact matrices and hydrophobicity profiles in prote	Proteins 58, 22-30 (2005)
28	BASU050103	Interactivity scale obtained by maximizing the mean of correlation coefficient over pairs of sequences sharing the TIM barrel fold (Bastolla et al., 2005)	Bastolla, U., Porto M., Roman H.E. and Vendruscolo M.	Principal eigenvector of contact matrices and hydrophobicity profiles in prote	Proteins 58, 22-30 (2005)
29	BEGF750101	Conformational parameter of inner helix (Beghin-Dirkx, 1975)	Beghin, F. and Dirkx, J.	Une methode statistique simple de prediction des conformations proteiques	Arch. Int. Physiol. Biochim. 83, 167-168 (1975)
30	BEGF750102	Conformational parameter of beta-structure (Beghin-Dirkx, 1975)	Beghin, F. and Dirkx, J.	Une methode statistique simple de prediction des conformations proteiques	Arch. Int. Physiol. Biochim. 83, 167-168 (1975)
31	BEGF750103	Conformational parameter of beta-turn (Beghin-Dirkx, 1975)	Beghin, F. and Dirkx, J.	Une methode statistique simple de prediction des conformations proteiques	Arch. Int. Physiol. Biochim. 83, 167-168 (1975)
32	BHAR880101	Average flexibility indices (Bhaskaran-Ponnuswamy, 1988)	Bhaskaran, R. and Ponnuswamy, P.K.	Positional flexibilities of amino acid residues in globular proteins	Int. J. Peptide Protein Res. 32, 241-255 (1988)
33	BIGC670101	Residue volume (Bigelow, 1967)	Bigelow, C.C.	On the average hydrophobicity of proteins and the relation between it and protein structure	J. Theor. Biol. 16, 187-211 (1967)
34	BIOV880101	Information value for accessibility; average fraction 35% (Biou et al., 1988)	Biou, V., Gibrat, J.F., Levin, J.M., Robson, B. and Garnier, J.	Secondary structure prediction: combination of three different methods	Protein Engineering 2, 185-191 (1988)
35	BIOV880102	Information value for accessibility; average fraction 23% (Biou et al., 1988)	Biou, V., Gibrat, J.F., Levin, J.M., Robson, B. and Garnier, J.	Secondary structure prediction: combination of three different methods	Protein Engineering 2, 185-191 (1988)
36	BLAM930101	Alpha helix propensity of position 44 in T4 lysozyme (Blaber et al., 1993)	Blaber, M., Zhang, X.J. and Matthews, B.W.	Structural basis of amino acid alpha helix propensity	Science 260, 1637-1640 (1993)
37	BLAS910101	Scaled side chain hydrophobicity values (Black-Mould, 1991)	Black, S.D. and Mould D.R.	Development of Hydrophobicity Parameters to Analyze Proteins Which Bear Post- or Cotranslational Modifications	Analytical Biochemistry 193, 72-82 (1991)
38	BROC820101	Retention coefficient in TFA (Browne et al., 1982)	Browne, C.A., Bennett, H.P.J. and Solomon, S.	The isolation of peptides by high-performance liquid chromatography using predicted elution positions	Anal. Biochem. 124, 201-208 (1982)
39	BROC820102	Retention coefficient in HFBA (Browne et al., 1982)	Browne, C.A., Bennett, H.P.J. and Solomon, S.	The isolation of peptides by high-performance liquid chromatography using predicted elution positions	Anal. Biochem. 124, 201-208 (1982)
40	BULH740101	Transfer free energy to surface (Bull-Breese, 1974)	Bull, H.B. and Breese, K.	Surface tension of amino acid solutions: A hydrophobicity scale of the amino acid residues	Arch. Biochem. Biophys. 161, 665-670 (1974)
41	BULH740102	Apparent partial specific volume (Bull-Breese, 1974)	Bull, H.B. and Breese, K.	Surface tension of amino acid solutions: A hydrophobicity scale of the amino acid residues	Arch. Biochem. Biophys. 161, 665-670 (1974)
42	BUNA790101	alpha-NH chemical shifts (Bundi-Wuthrich, 1979)	Bundi, A. and Wuthrich, K.	1H-nmr parameters of the common amino acid residues measured in aqueous solutions of the linear tetrapeptides H-Gly-Gly-X-L-Ala-OH	Biopolymers 18, 285-297 (1979)
43	BUNA790102	alpha-CH chemical shifts (Bundi-Wuthrich, 1979)	Bundi, A. and Wuthrich, K.	1H-nmr parameters of the common amino acid residues measured in aqueous solutions of the linear tetrapeptides H-Gly-Gly-X-L-Ala-OH	Biopolymers 18, 285-297 (1979)
44	BUNA790103	Spin-spin coupling constants 3JHalpha-NH (Bundi-Wuthrich, 1979)	Bundi, A. and Wuthrich, K.	1H-nmr parameters of the common amino acid residues measured in aqueous solutions of the linear tetrapeptides H-Gly-Gly-X-L-Ala-OH	Biopolymers 18, 285-297 (1979)
45	BURA740101	Normalized frequency of alpha-helix (Burgess et al., 1974)	Burgess, A.W., Ponnuswamy, P.K. and Scheraga, H.A.	Analysis of conformations of amino acid residues and prediction of backbone topography in proteins	Isr. J. Chem. 12, 239-286 (1974)
46	BURA740102	Normalized frequency of extended structure (Burgess et al., 1974)	Burgess, A.W., Ponnuswamy, P.K. and Scheraga, H.A.	Analysis of conformations of amino acid residues and prediction of backbone topography in proteins	Isr. J. Chem. 12, 239-286 (1974)
47	CASG920101	Hydrophobicity scale from native protein structures (Casari-Sippl, 1992)	Casari, G. and Sippl, M.	Structure-derived Hydrophobic Potential. Hydrophobic Potential Derived from X-ray Structures of Globular Proteins is able to Identify Native Folds	J. Mol. Biol. 224, 725-732 (1992)
48	CEDJ970101	Composition of amino acids in extracellular proteins (percent) (Cedano et al., 1997)	Cedano, J., Aloy, P., Perez-Pons, J.A. and Querol, E.	Relation between amino acid composition and cellular location of proteins	J. Mol. Biol. 266, 594-600 (1997)
49	CEDJ970102	Composition of amino acids in anchored proteins (percent) (Cedano et al., 1997)	Cedano, J., Aloy, P., Perez-Pons, J.A. and Querol, E.	Relation between amino acid composition and cellular location of proteins	J. Mol. Biol. 266, 594-600 (1997)
50	CEDJ970103	Composition of amino acids in membrane proteins (percent) (Cedano et al., 1997)	Cedano, J., Aloy, P., Perez-Pons, J.A. and Querol, E.	Relation between amino acid composition and cellular location of proteins	J. Mol. Biol. 266, 594-600 (1997)
51	CEDJ970104	Composition of amino acids in intracellular proteins (percent) (Cedano et al., 1997)	Cedano, J., Aloy, P., Perez-Pons, J.A. and Querol, E.	Relation between amino acid composition and cellular location of proteins	J. Mol. Biol. 266, 594-600 (1997)
52	CEDJ970105	Composition of amino acids in nuclear proteins (percent) (Cedano et al., 1997)	Cedano, J., Aloy, P., Perez-Pons, J.A. and Querol, E.	Relation between amino acid composition and cellular location of proteins	J. Mol. Biol. 266, 594-600 (1997)
53	CHAM810101	Steric parameter (Charton, 1981)	Charton, M.	Protein folding and the genetic code: An alternative quantitative model	J. Theor. Biol. 91, 115-123 (1981)
54	CHAM820101	Polarizability parameter (Charton-Charton, 1982)	Charton, M. and Charton, B.I.	The structural dependence of amino acid hydrophobicity parameters	J. Theor. Biol. 99, 629-644 (1982)
55	CHAM820102	Free energy of solution in water, kcal/mole (Charton-Charton, 1982)	Charton, M. and Charton, B.I.	The structural dependence of amino acid hydrophobicity parameters	J. Theor. Biol. 99, 629-644 (1982)
56	CHAM830101	The Chou-Fasman parameter of the coil conformation (Charton-Charton, 1983)	Charton, M. and Charton, B.	The dependence of the Chou-Fasman parameters on amino acid side chain structure	J. Theor. Biol. 111, 447-450 (1983)
57	CHAM830102	A parameter defined from the residuals obtained from the best correlation of the Chou-Fasman parameter of beta-sheet (Charton-Charton, 1983)	Charton, M. and Charton, B.	The dependence of the Chou-Fasman parameters on amino acid side chain structure	J. Theor. Biol. 111, 447-450 (1983)
58	CHAM830103	The number of atoms in the side chain labelled 1+1 (Charton-Charton, 1983)	Charton, M. and Charton, B.	The dependence of the Chou-Fasman parameters on amino acid side chain structure	J. Theor. Biol. 111, 447-450 (1983)
59	CHAM830104	The number of atoms in the side chain labelled 2+1 (Charton-Charton, 1983)	Charton, M. and Charton, B.	The dependence of the Chou-Fasman parameters on amino acid side chain structure	J. Theor. Biol. 111, 447-450 (1983)
60	CHAM830105	The number of atoms in the side chain labelled 3+1 (Charton-Charton, 1983)	Charton, M. and Charton, B.	The dependence of the Chou-Fasman parameters on amino acid side chain structure	J. Theor. Biol. 111, 447-450 (1983)
61	CHAM830106	The number of bonds in the longest chain (Charton-Charton, 1983)	Charton, M. and Charton, B.	The dependence of the Chou-Fasman parameters on amino acid side chain structure	J. Theor. Biol. 111, 447-450 (1983)
62	CHAM830107	A parameter of charge transfer capability (Charton-Charton, 1983)	Charton, M. and Charton, B.	The dependence of the Chou-Fasman parameters on amino acid side chain structure	J. Theor. Biol. 111, 447-450 (1983)
63	CHAM830108	A parameter of charge transfer donor capability (Charton-Charton, 1983)	Charton, M. and Charton, B.	The dependence of the Chou-Fasman parameters on amino acid side chain structure	J. Theor. Biol. 111, 447-450 (1983)
64	CHOC750101	Average volume of buried residue (Chothia, 1975)	Chothia, C.	Structural invariants in protein folding	Nature 254, 304-308 (1975)
65	CHOC760101	Residue accessible surface area in tripeptide (Chothia, 1976)	Chothia, C.	The nature of the accessible and buried surfaces in proteins	J. Mol. Biol. 105, 1-14 (1976)
66	CHOC760102	Residue accessible surface area in folded protein (Chothia, 1976)	Chothia, C.	The nature of the accessible and buried surfaces in proteins	J. Mol. Biol. 105, 1-14 (1976)
67	CHOC760103	Proportion of residues 95% buried (Chothia, 1976)	Chothia, C.	The nature of the accessible and buried surfaces in proteins	J. Mol. Biol. 105, 1-14 (1976)
68	CHOC760104	Proportion of residues 100% buried (Chothia, 1976)	Chothia, C.	The nature of the accessible and buried surfaces in proteins	J. Mol. Biol. 105, 1-14 (1976)
69	CHOP780101	Normalized frequency of beta-turn (Chou-Fasman, 1978a)	Chou, P.Y. and Fasman, G.D.	Empirical predictions of protein conformation	Ann. Rev. Biochem. 47, 251-276 (1978)
70	CHOP780201	Normalized frequency of alpha-helix (Chou-Fasman, 1978b)	Chou, P.Y. and Fasman, G.D.	Prediction of the secondary structure of proteins from their amino acid sequence	Adv. Enzymol. 47, 45-148 (1978)
71	CHOP780202	Normalized frequency of beta-sheet (Chou-Fasman, 1978b)	Chou, P.Y. and Fasman, G.D.	Prediction of the secondary structure of proteins from their amino acid sequence	Adv. Enzymol. 47, 45-148 (1978)
72	CHOP780203	Normalized frequency of beta-turn (Chou-Fasman, 1978b)	Chou, P.Y. and Fasman, G.D.	Prediction of the secondary structure of proteins from their amino acid sequence	Adv. Enzymol. 47, 45-148 (1978)
73	CHOP780204	Normalized frequency of N-terminal helix (Chou-Fasman, 1978b)	Chou, P.Y. and Fasman, G.D.	Prediction of the secondary structure of proteins from their amino acid sequence	Adv. Enzymol. 47, 45-148 (1978)
74	CHOP780205	Normalized frequency of C-terminal helix (Chou-Fasman, 1978b)	Chou, P.Y. and Fasman, G.D.	Prediction of the secondary structure of proteins from their amino acid sequence	Adv. Enzymol. 47, 45-148 (1978)
75	CHOP780206	Normalized frequency of N-terminal non helical region (Chou-Fasman, 1978b)	Chou, P.Y. and Fasman, G.D.	Prediction of the secondary structure of proteins from their amino acid sequence	Adv. Enzymol. 47, 45-148 (1978)
76	CHOP780207	Normalized frequency of C-terminal non helical region (Chou-Fasman, 1978b)	Chou, P.Y. and Fasman, G.D.	Prediction of the secondary structure of proteins from their amino acid sequence	Adv. Enzymol. 47, 45-148 (1978)
77	CHOP780208	Normalized frequency of N-terminal beta-sheet (Chou-Fasman, 1978b)	Chou, P.Y. and Fasman, G.D.	Prediction of the secondary structure of proteins from their amino acid sequence	Adv. Enzymol. 47, 45-148 (1978)
78	CHOP780209	Normalized frequency of C-terminal beta-sheet (Chou-Fasman, 1978b)	Chou, P.Y. and Fasman, G.D.	Prediction of the secondary structure of proteins from their amino acid sequence	Adv. Enzymol. 47, 45-148 (1978)
79	CHOP780210	Normalized frequency of N-terminal non beta region (Chou-Fasman, 1978b)	Chou, P.Y. and Fasman, G.D.	Prediction of the secondary structure of proteins from their amino acid sequence	Adv. Enzymol. 47, 45-148 (1978)
80	CHOP780211	Normalized frequency of C-terminal non beta region (Chou-Fasman, 1978b)	Chou, P.Y. and Fasman, G.D.	Prediction of the secondary structure of proteins from their amino acid sequence	Adv. Enzymol. 47, 45-148 (1978)
81	CHOP780212	Frequency of the 1st residue in turn (Chou-Fasman, 1978b)	Chou, P.Y. and Fasman, G.D.	Prediction of the secondary structure of proteins from their amino acid sequence	Adv. Enzymol. 47, 45-148 (1978)
82	CHOP780213	Frequency of the 2nd residue in turn (Chou-Fasman, 1978b)	Chou, P.Y. and Fasman, G.D.	Prediction of the secondary structure of proteins from their amino acid sequence	Adv. Enzymol. 47, 45-148 (1978)
83	CHOP780214	Frequency of the 3rd residue in turn (Chou-Fasman, 1978b)	Chou, P.Y. and Fasman, G.D.	Prediction of the secondary structure of proteins from their amino acid sequence	Adv. Enzymol. 47, 45-148 (1978)
84	CHOP780215	Frequency of the 4th residue in turn (Chou-Fasman, 1978b)	Chou, P.Y. and Fasman, G.D.	Prediction of the secondary structure of proteins from their amino acid sequence	Adv. Enzymol. 47, 45-148 (1978)
85	CHOP780216	Normalized frequency of the 2nd and 3rd residues in turn (Chou-Fasman, 1978b)	Chou, P.Y. and Fasman, G.D.	Prediction of the secondary structure of proteins from their amino acid sequence	Adv. Enzymol. 47, 45-148 (1978)
86	CIDH920101	Normalized hydrophobicity scales for alpha-proteins (Cid et al., 1992)	Cid, H., Bunster, M., Canales, M. and Gazitua, F.	Hydrophobicity and structural classes in proteins	Protein Engineering 5, 373-375 (1992)
87	CIDH920102	Normalized hydrophobicity scales for beta-proteins (Cid et al., 1992)	Cid, H., Bunster, M., Canales, M. and Gazitua, F.	Hydrophobicity and structural classes in proteins	Protein Engineering 5, 373-375 (1992)
88	CIDH920103	Normalized hydrophobicity scales for alpha+beta-proteins (Cid et al., 1992)	Cid, H., Bunster, M., Canales, M. and Gazitua, F.	Hydrophobicity and structural classes in proteins	Protein Engineering 5, 373-375 (1992)
89	CIDH920104	Normalized hydrophobicity scales for alpha/beta-proteins (Cid et al., 1992)	Cid, H., Bunster, M., Canales, M. and Gazitua, F.	Hydrophobicity and structural classes in proteins	Protein Engineering 5, 373-375 (1992)
90	CIDH920105	Normalized average hydrophobicity scales (Cid et al., 1992)	Cid, H., Bunster, M., Canales, M. and Gazitua, F.	Hydrophobicity and structural classes in proteins	Protein Engineering 5, 373-375 (1992)
91	COHE430101	Partial specific volume (Cohn-Edsall, 1943)	Cohn, E.J. and Edsall, J.T.		Protein, Amino Acid, and Peptides, Reinhold, New York (1943)
92	CORJ870101	NNEIG index (Cornette et al., 1987)	Cornette, J.L., Cease, K.B., Margalit, H., Spouge, J.L., Berzofsky, J.A. and DeLisi, C.	Hydrophobicity Scales and Computational Techniques for Detecting Amphipathic Structures in Proteins	J. Mol. Biol. 196, 659-685, (1987)
93	CORJ870102	SWEIG index (Cornette et al., 1987)	Cornette, J.L., Cease, K.B., Margalit, H., Spouge, J.L., Berzofsky, J.A. and DeLisi, C.	Hydrophobicity Scales and Computational Techniques for Detecting Amphipathic Structures in Proteins	J. Mol. Biol. 196, 659-685, (1987)
94	CORJ870103	PRIFT index (Cornette et al., 1987)	Cornette, J.L., Cease, K.B., Margalit, H., Spouge, J.L., Berzofsky, J.A. and DeLisi, C.	Hydrophobicity Scales and Computational Techniques for Detecting Amphipathic Structures in Proteins	J. Mol. Biol. 196, 659-685, (1987)
95	CORJ870104	PRILS index (Cornette et al., 1987)	Cornette, J.L., Cease, K.B., Margalit, H., Spouge, J.L., Berzofsky, J.A. and DeLisi, C.	Hydrophobicity Scales and Computational Techniques for Detecting Amphipathic Structures in Proteins	J. Mol. Biol. 196, 659-685, (1987)
96	CORJ870105	ALTFT index (Cornette et al., 1987)	Cornette, J.L., Cease, K.B., Margalit, H., Spouge, J.L., Berzofsky, J.A. and DeLisi, C.	Hydrophobicity Scales and Computational Techniques for Detecting Amphipathic Structures in Proteins	J. Mol. Biol. 196, 659-685, (1987)
97	CORJ870106	ALTLS index (Cornette et al., 1987)	Cornette, J.L., Cease, K.B., Margalit, H., Spouge, J.L., Berzofsky, J.A. and DeLisi, C.	Hydrophobicity Scales and Computational Techniques for Detecting Amphipathic Structures in Proteins	J. Mol. Biol. 196, 659-685, (1987)
98	CORJ870107	TOTFT index (Cornette et al., 1987)	Cornette, J.L., Cease, K.B., Margalit, H., Spouge, J.L., Berzofsky, J.A. and DeLisi, C.	Hydrophobicity Scales and Computational Techniques for Detecting Amphipathic Structures in Proteins	J. Mol. Biol. 196, 659-685, (1987)
99	CORJ870108	TOTLS index (Cornette et al., 1987)	Cornette, J.L., Cease, K.B., Margalit, H., Spouge, J.L., Berzofsky, J.A. and DeLisi, C.	Hydrophobicity Scales and Computational Techniques for Detecting Amphipathic Structures in Proteins	J. Mol. Biol. 196, 659-685, (1987)
100	COSI940101	Electron-ion interaction potential values (Cosic, 1994)	Cosic, I.	Macromolecular bioactivity: is it resonant interaction between macromolecules?--Theory and applications	IEEE Trans Biomed Eng. 41, 1101-1114 (1994) (values are cited from Protein Eng. 15:193-203)
101	COWR900101	Hydrophobicity index, 3.0 pH (Cowan-Whittaker, 1990)	Cowan, R. and Whittaker, R.G.	Hydrophobicity indices for amino acid residues as determined by high-performance liquid chromatography	Peptide Res. 3, 75-80 (1990)
102	CRAJ730101	Normalized frequency of middle helix (Crawford et al., 1973)	Crawford, J.L., Lipscomb, W.N. and Schellman, C.G.	The reverse turn as a polypeptide conformation in globular proteins	Proc. Natl. Acad. Sci. USA 70, 538-542 (1973)
103	CRAJ730102	Normalized frequency of beta-sheet (Crawford et al., 1973)	Crawford, J.L., Lipscomb, W.N. and Schellman, C.G.	The reverse turn as a polypeptide conformation in globular proteins	Proc. Natl. Acad. Sci. USA 70, 538-542 (1973)
104	CRAJ730103	Normalized frequency of turn (Crawford et al., 1973)	Crawford, J.L., Lipscomb, W.N. and Schellman, C.G.	The reverse turn as a polypeptide conformation in globular proteins	Proc. Natl. Acad. Sci. USA 70, 538-542 (1973)
105	DAWD720101	Size (Dawson, 1972)	Dawson, D.M.		In "The Biochemical Genetics of Man" (Brock, D.J.H. and Mayo, O., eds.), Academic Press, New York, pp.1-38 (1972)
106	DAYM780101	Amino acid composition (Dayhoff et al., 1978a)	Dayhoff, M.O., Hunt, L.T. and Hurst-Calderone, S.	Composition of proteins	In "Atlas of Protein Sequence and Structure", Vol.5, Suppl.3 (Dayhoff, M.O., ed.), National Biomedical Research Foundation, Washington, D.C., p.363 (1978)
107	DAYM780201	Relative mutability (Dayhoff et al., 1978b)	Dayhoff, M.O., Schwartz, R.M. and Orcutt, B.C.	A model of evolutionary change in proteins	In "Atlas of Protein Sequence and Structure", Vol.5, Suppl.3 (Dayhoff, M.O., ed.), National Biomedical Research Foundation, Washington, D.C. pp. 345-352 (1978)
108	DESM900101	Membrane preference for cytochrome b: MPH89 (Degli Esposti et al., 1990)	Degli Esposti, M., Crimi, M. and Venturoli, G.	A critical evaluation of the hydropathy profile of membrane proteins	Eur. J. Biochem. 190, 207-219 (1990)
109	DESM900102	Average membrane preference: AMP07 (Degli Esposti et al., 1990)	Degli Esposti, M., Crimi, M. and Venturoli, G.	A critical evaluation of the hydropathy profile of membrane proteins	Eur. J. Biochem. 190, 207-219 (1990)
110	DIGM050101	Hydrostatic pressure asymmetry index, PAI (Di Giulio, 2005)	Di Giulio M.	A comparison of proteins from Pyrococcus furiosus and Pyrococcus abyssi: barophily in the physicochemical properties of amino acids and in the genetic code	Gene 346, 1-6 (2005)
111	EISD840101	Consensus normalized hydrophobicity scale (Eisenberg, 1984)	Eisenberg, D.	Three-dimensional structure of membrane and surface proteins	Ann. Rev. Biochem. 53, 595-623 (1984) Original references: Eisenberg, D., Weiss, R.M., Terwilliger, T.C. and Wilcox, W. Faraday Symp. Chem. Soc. 17, 109-120 (1982) Eisenberg, D., Weiss, R.M. and Terwilliger, T.C. The hydrophobic moment detects periodicity in protein hydrophobicity Proc. Natl. Acad. Sci. USA 81, 140-144 (1984)
112	EISD860101	Solvation free energy (Eisenberg-McLachlan, 1986)	Eisenberg, D. and McLachlan, A.D.	Solvation energy in protein folding and binding	Nature 319, 199-203 (1986)
113	EISD860102	Atom-based hydrophobic moment (Eisenberg-McLachlan, 1986)	Eisenberg, D. and McLachlan, A.D.	Solvation energy in protein folding and binding	Nature 319, 199-203 (1986)
114	EISD860103	Direction of hydrophobic moment (Eisenberg-McLachlan, 1986)	Eisenberg, D. and McLachlan, A.D.	Solvation energy in protein folding and binding	Nature 319, 199-203 (1986)
115	ENGD860101	Hydrophobicity index (Engelman et al., 1986)	Engelman, D.M., Steitz, T.A. and Goldman, A.	Identifying Nonpolar Transbilayer Helices in Amino Acid Sequences of Membrane Proteins	Ann.Rev.Biophys.Biophys.Chem. 15, 321-353 (1986)
116	FASG760101	Molecular weight (Fasman, 1976)	Fasman, G.D., ed.		Handbook of Biochemistry and Molecular Biology, 3rd ed., Proteins - Volume 1, CRC Press, Cleveland (1976)
117	FASG760102	Melting point (Fasman, 1976)	Fasman, G.D., ed.		Handbook of Biochemistry and Molecular Biology, 3rd ed., Proteins - Volume 1, CRC Press, Cleveland (1976)
118	FASG760103	Optical rotation (Fasman, 1976)	Fasman, G.D., ed.		Handbook of Biochemistry and Molecular Biology, 3rd ed., Proteins - Volume 1, CRC Press, Cleveland (1976)
119	FASG760104	pK-N (Fasman, 1976)	Fasman, G.D., ed.		Handbook of Biochemistry and Molecular Biology, 3rd ed., Proteins - Volume 1, CRC Press, Cleveland (1976)
120	FASG760105	pK-C (Fasman, 1976)	Fasman, G.D., ed.		Handbook of Biochemistry and Molecular Biology, 3rd ed., Proteins - Volume 1, CRC Press, Cleveland (1976)
121	FASG890101	Hydrophobicity index (Fasman, 1989)	Fasman, G.D.	Prediction of Protein Structure and the Principles of Protein Conformation	Plenum, New York 1989, page 457, Table XVII
122	FAUJ830101	Hydrophobic parameter pi (Fauchere-Pliska, 1983)	Fauchere, J.L. and Pliska, V.	Hydrophobic parameters pi of amino-acid side chains from the partitioning of N-acetyl-amino-acid amides	Eur. J. Med. Chem. 18, 369-375 (1983)
123	FAUJ880101	Graph shape index (Fauchere et al., 1988)	Fauchere, J.L., Charton, M., Kier, L.B., Verloop, A. and Pliska, V.	Amino acid side chain parameters for correlation studies in biology and pharmacology	Int. J. Peptide Protein Res. 32, 269-278 (1988) Original reference: Kier, L.B. Quant. Struct. Act. Relat. 6, 117-122 (1987)
124	FAUJ880102	Smoothed upsilon steric parameter (Fauchere et al., 1988)	Fauchere, J.L., Charton, M., Kier, L.B., Verloop, A. and Pliska, V.	Amino acid side chain parameters for correlation studies in biology and pharmacology	Int. J. Peptide Protein Res. 32, 269-278 (1988)
125	FAUJ880103	Normalized van der Waals volume (Fauchere et al., 1988)	Fauchere, J.L., Charton, M., Kier, L.B., Verloop, A. and Pliska, V.	Amino acid side chain parameters for correlation studies in biology and pharmacology	Int. J. Peptide Protein Res. 32, 269-278 (1988)
126	FAUJ880104	STERIMOL length of the side chain (Fauchere et al., 1988)	Fauchere, J.L., Charton, M., Kier, L.B., Verloop, A. and Pliska, V.	Amino acid side chain parameters for correlation studies in biology and pharmacology	Int. J. Peptide Protein Res. 32, 269-278 (1988)
127	FAUJ880105	STERIMOL minimum width of the side chain (Fauchere et al., 1988)	Fauchere, J.L., Charton, M., Kier, L.B., Verloop, A. and Pliska, V.	Amino acid side chain parameters for correlation studies in biology and pharmacology	Int. J. Peptide Protein Res. 32, 269-278 (1988)
128	FAUJ880106	STERIMOL maximum width of the side chain (Fauchere et al., 1988)	Fauchere, J.L., Charton, M., Kier, L.B., Verloop, A. and Pliska, V.	Amino acid side chain parameters for correlation studies in biology and pharmacology	Int. J. Peptide Protein Res. 32, 269-278 (1988)
129	FAUJ880107	N.m.r. chemical shift of alpha-carbon (Fauchere et al., 1988)	Fauchere, J.L., Charton, M., Kier, L.B., Verloop, A. and Pliska, V.	Amino acid side chain parameters for correlation studies in biology and pharmacology	Int. J. Peptide Protein Res. 32, 269-278 (1988)
130	FAUJ880108	Localized electrical effect (Fauchere et al., 1988)	Fauchere, J.L., Charton, M., Kier, L.B., Verloop, A. and Pliska, V.	Amino acid side chain parameters for correlation studies in biology and pharmacology	Int. J. Peptide Protein Res. 32, 269-278 (1988)
131	FAUJ880109	Number of hydrogen bond donors (Fauchere et al., 1988)	Fauchere, J.L., Charton, M., Kier, L.B., Verloop, A. and Pliska, V.	Amino acid side chain parameters for correlation studies in biology and pharmacology	Int. J. Peptide Protein Res. 32, 269-278 (1988)
132	FAUJ880110	Number of full nonbonding orbitals (Fauchere et al., 1988)	Fauchere, J.L., Charton, M., Kier, L.B., Verloop, A. and Pliska, V.	Amino acid side chain parameters for correlation studies in biology and pharmacology	Int. J. Peptide Protein Res. 32, 269-278 (1988)
133	FAUJ880111	Positive charge (Fauchere et al., 1988)	Fauchere, J.L., Charton, M., Kier, L.B., Verloop, A. and Pliska, V.	Amino acid side chain parameters for correlation studies in biology and pharmacology	Int. J. Peptide Protein Res. 32, 269-278 (1988)
134	FAUJ880112	Negative charge (Fauchere et al., 1988)	Fauchere, J.L., Charton, M., Kier, L.B., Verloop, A. and Pliska, V.	Amino acid side chain parameters for correlation studies in biology and pharmacology	Int. J. Peptide Protein Res. 32, 269-278 (1988)
135	FAUJ880113	pK-a(RCOOH) (Fauchere et al., 1988)	Fauchere, J.L., Charton, M., Kier, L.B., Verloop, A. and Pliska, V.	Amino acid side chain parameters for correlation studies in biology and pharmacology	Int. J. Peptide Protein Res. 32, 269-278 (1988)
136	FINA770101	Helix-coil equilibrium constant (Finkelstein-Ptitsyn, 1977)	Finkelstein, A.V. and Ptitsyn, O.B.	Theory of protein molecule self-organization. II. A comparison of calculated thermodynamic parameters of local secondary structures with experiments	Biopolymers 16, 497-524 (1977)
137	FINA910101	Helix initiation parameter at posision i-1 (Finkelstein et al., 1991)	Finkelstein, A.V., Badretdinov, A.Y. and Ptitsyn, O.B.	Physical reasons for secondary structure stability: alpha-helices in short peptides	Proteins 10, 287-299 (1991)
138	FINA910102	Helix initiation parameter at posision i,i+1,i+2 (Finkelstein et al., 1991)	Finkelstein, A.V., Badretdinov, A.Y. and Ptitsyn, O.B.	Physical reasons for secondary structure stability: alpha-helices in short peptides	Proteins 10, 287-299 (1991)
139	FINA910103	Helix termination parameter at posision j-2,j-1,j (Finkelstein et al., 1991)	Finkelstein, A.V., Badretdinov, A.Y. and Ptitsyn, O.B.	Physical reasons for secondary structure stability: alpha-helices in short peptides	Proteins 10, 287-299 (1991)
140	FINA910104	Helix termination parameter at posision j+1 (Finkelstein et al., 1991)	Finkelstein, A.V., Badretdinov, A.Y. and Ptitsyn, O.B.	Physical reasons for secondary structure stability: alpha-helices in short peptides	Proteins 10, 287-299 (1991)
141	FODM020101	Propensity of amino acids within pi-helices (Fodje-Al-Karadaghi, 2002)	Fodje, M.N. and Al-Karadaghi, S.	Occurrence, conformational features and amino acid propensities for the pi-helix	Protein Eng. 15, 353-358 (2002)
142	FUKS010101	Surface composition of amino acids in intracellular proteins of thermophiles (percent) (Fukuchi-Nishikawa, 2001)	Fukuchi, S. and Nishikawa, K.	Protein surface amino acid compositions distinctively differ between thermophilic and mesophilic bacteria	J. Mol. Biol. 309, 835-843 (2001)
143	FUKS010102	Surface composition of amino acids in intracellular proteins of mesophiles (percent) (Fukuchi-Nishikawa, 2001)	Fukuchi, S. and Nishikawa, K.	Protein surface amino acid compositions distinctively differ between thermophilic and mesophilic bacteria	J. Mol. Biol. 309, 835-843 (2001)
144	FUKS010103	Surface composition of amino acids in extracellular proteins of mesophiles (percent) (Fukuchi-Nishikawa, 2001)	Fukuchi, S. and Nishikawa, K.	Protein surface amino acid compositions distinctively differ between thermophilic and mesophilic bacteria	J. Mol. Biol. 309, 835-843 (2001)
145	FUKS010104	Surface composition of amino acids in nuclear proteins (percent) (Fukuchi-Nishikawa, 2001)	Fukuchi, S. and Nishikawa, K.	Protein surface amino acid compositions distinctively differ between thermophilic and mesophilic bacteria	J. Mol. Biol. 309, 835-843 (2001)
146	FUKS010105	Interior composition of amino acids in intracellular proteins of thermophiles (percent) (Fukuchi-Nishikawa, 2001)	Fukuchi, S. and Nishikawa, K.	Protein surface amino acid compositions distinctively differ between thermophilic and mesophilic bacteria	J. Mol. Biol. 309, 835-843 (2001)
147	FUKS010106	Interior composition of amino acids in intracellular proteins of mesophiles (percent) (Fukuchi-Nishikawa, 2001)	Fukuchi, S. and Nishikawa, K.	Protein surface amino acid compositions distinctively differ between thermophilic and mesophilic bacteria	J. Mol. Biol. 309, 835-843 (2001)
148	FUKS010107	Interior composition of amino acids in extracellular proteins of mesophiles (percent) (Fukuchi-Nishikawa, 2001)	Fukuchi, S. and Nishikawa, K.	Protein surface amino acid compositions distinctively differ between thermophilic and mesophilic bacteria	J. Mol. Biol. 309, 835-843 (2001)
149	FUKS010108	Interior composition of amino acids in nuclear proteins (percent) (Fukuchi-Nishikawa, 2001)	Fukuchi, S. and Nishikawa, K.	Protein surface amino acid compositions distinctively differ between thermophilic and mesophilic bacteria	J. Mol. Biol. 309, 835-843 (2001)
150	FUKS010109	Entire chain composition of amino acids in intracellular proteins of thermophiles (percent) (Fukuchi-Nishikawa, 2001)	Fukuchi, S. and Nishikawa, K.	Protein surface amino acid compositions distinctively differ between thermophilic and mesophilic bacteria	J. Mol. Biol. 309, 835-843 (2001)
151	FUKS010110	Entire chain composition of amino acids in intracellular proteins of mesophiles (percent) (Fukuchi-Nishikawa, 2001)	Fukuchi, S. and Nishikawa, K.	Protein surface amino acid compositions distinctively differ between thermophilic and mesophilic bacteria	J. Mol. Biol. 309, 835-843 (2001)
152	FUKS010111	Entire chain composition of amino acids in extracellular proteins of mesophiles (percent) (Fukuchi-Nishikawa, 2001)	Fukuchi, S. and Nishikawa, K.	Protein surface amino acid compositions distinctively differ between thermophilic and mesophilic bacteria	J. Mol. Biol. 309, 835-843 (2001)
153	FUKS010112	Entire chain compositino of amino acids in nuclear proteins (percent) (Fukuchi-Nishikawa, 2001)	Fukuchi, S. and Nishikawa, K.	Protein surface amino acid compositions distinctively differ between thermophilic and mesophilic bacteria	J. Mol. Biol. 309, 835-843 (2001)
154	GARJ730101	Partition coefficient (Garel et al., 1973)	Garel, J.P., Filliol, D. and Mandel, P.	Coefficients de partage d'aminoacides, nucleobases, nucleosides et nucleotides dans un systeme solvant salin	J. Chromatogr. 78, 381-391 (1973)
155	GEIM800101	Alpha-helix indices (Geisow-Roberts, 1980)	Geisow, M.J. and Roberts, R.D.B.	Amino acid preferences for secondary structure vary with protein class	Int. J. Biol. Macromol. 2, 387-389 (1980)
156	GEIM800102	Alpha-helix indices for alpha-proteins (Geisow-Roberts, 1980)	Geisow, M.J. and Roberts, R.D.B.	Amino acid preferences for secondary structure vary with protein class	Int. J. Biol. Macromol. 2, 387-389 (1980)
157	GEIM800103	Alpha-helix indices for beta-proteins (Geisow-Roberts, 1980)	Geisow, M.J. and Roberts, R.D.B.	Amino acid preferences for secondary structure vary with protein class	Int. J. Biol. Macromol. 2, 387-389 (1980)
158	GEIM800104	Alpha-helix indices for alpha/beta-proteins (Geisow-Roberts, 1980)	Geisow, M.J. and Roberts, R.D.B.	Amino acid preferences for secondary structure vary with protein class	Int. J. Biol. Macromol. 2, 387-389 (1980)
159	GEIM800105	Beta-strand indices (Geisow-Roberts, 1980)	Geisow, M.J. and Roberts, R.D.B.	Amino acid preferences for secondary structure vary with protein class	Int. J. Biol. Macromol. 2, 387-389 (1980)
160	GEIM800106	Beta-strand indices for beta-proteins (Geisow-Roberts, 1980)	Geisow, M.J. and Roberts, R.D.B.	Amino acid preferences for secondary structure vary with protein class	Int. J. Biol. Macromol. 2, 387-389 (1980)
161	GEIM800107	Beta-strand indices for alpha/beta-proteins (Geisow-Roberts, 1980)	Geisow, M.J. and Roberts, R.D.B.	Amino acid preferences for secondary structure vary with protein class	Int. J. Biol. Macromol. 2, 387-389 (1980)
162	GEIM800108	Aperiodic indices (Geisow-Roberts, 1980)	Geisow, M.J. and Roberts, R.D.B.	Amino acid preferences for secondary structure vary with protein class	Int. J. Biol. Macromol. 2, 387-389 (1980)
163	GEIM800109	Aperiodic indices for alpha-proteins (Geisow-Roberts, 1980)	Geisow, M.J. and Roberts, R.D.B.	Amino acid preferences for secondary structure vary with protein class	Int. J. Biol. Macromol. 2, 387-389 (1980)
164	GEIM800110	Aperiodic indices for beta-proteins (Geisow-Roberts, 1980)	Geisow, M.J. and Roberts, R.D.B.	Amino acid preferences for secondary structure vary with protein class	Int. J. Biol. Macromol. 2, 387-389 (1980)
165	GEIM800111	Aperiodic indices for alpha/beta-proteins (Geisow-Roberts, 1980)	Geisow, M.J. and Roberts, R.D.B.	Amino acid preferences for secondary structure vary with protein class	Int. J. Biol. Macromol. 2, 387-389 (1980)
166	GEOR030101	Linker propensity from all dataset (George-Heringa, 2003)	George, R.A. and Heringa, J.	An analysis of protein domain linkers: their classification and role in protein folding	Protein Eng. 15, 871-879 (2003)
167	GEOR030102	Linker propensity from 1-linker dataset (George-Heringa, 2003)	George, R.A. and Heringa, J.	An analysis of protein domain linkers: their classification and role in protein folding	Protein Eng. 15, 871-879 (2003)
168	GEOR030103	Linker propensity from 2-linker dataset (George-Heringa, 2003)	George, R.A. and Heringa, J.	An analysis of protein domain linkers: their classification and role in protein folding	Protein Eng. 15, 871-879 (2003)
169	GEOR030104	Linker propensity from 3-linker dataset (George-Heringa, 2003)	George, R.A. and Heringa, J.	An analysis of protein domain linkers: their classification and role in protein folding	Protein Eng. 15, 871-879 (2003)
170	GEOR030105	Linker propensity from small dataset (linker length is less than six residues) (George-Heringa, 2003)	George, R.A. and Heringa, J.	An analysis of protein domain linkers: their classification and role in protein folding	Protein Eng. 15, 871-879 (2003)
171	GEOR030106	Linker propensity from medium dataset (linker length is between six and 14 residues) (George-Heringa, 2003)	George, R.A. and Heringa, J.	An analysis of protein domain linkers: their classification and role in protein folding	Protein Eng. 15, 871-879 (2003)
172	GEOR030107	Linker propensity from long dataset (linker length is greater than 14 residues) (George-Heringa, 2003)	George, R.A. and Heringa, J.	An analysis of protein domain linkers: their classification and role in protein folding	Protein Eng. 15, 871-879 (2003)
173	GEOR030108	Linker propensity from helical (annotated by DSSP) dataset (George-Heringa, 2003)	George, R.A. and Heringa, J.	An analysis of protein domain linkers: their classification and role in protein folding	Protein Eng. 15, 871-879 (2003)
174	GEOR030109	Linker propensity from non-helical (annotated by DSSP) dataset (George-Heringa, 2003)	George, R.A. and Heringa, J.	An analysis of protein domain linkers: their classification and role in protein folding	Protein Eng. 15, 871-879 (2003)
175	GOLD730101	Hydrophobicity factor (Goldsack-Chalifoux, 1973)	Goldsack, D.E. and Chalifoux, R.C.	Contribution of the free energy of mixing of hydrophobic side chains to the stability of the tertiary structure	J. Theor. Biol. 39, 645-651 (1973)
176	GOLD730102	Residue volume (Goldsack-Chalifoux, 1973)	Goldsack, D.E. and Chalifoux, R.C.	Contribution of the free energy of mixing of hydrophobic side chains to the stability of the tertiary structure	J. Theor. Biol. 39, 645-651 (1973)
177	GRAR740101	Composition (Grantham, 1974)	Grantham, R.	Amino acid difference formula to help explain protein evolution	Science 185, 862-864 (1974)
178	GRAR740102	Polarity (Grantham, 1974)	Grantham, R.	Amino acid difference formula to help explain protein evolution	Science 185, 862-864 (1974)
179	GRAR740103	Volume (Grantham, 1974)	Grantham, R.	Amino acid difference formula to help explain protein evolution	Science 185, 862-864 (1974)
180	GUOD860101	Retention coefficient at pH 2 (Guo et al., 1986)	Guo, D., Mant, C.T., Taneja, A.K., Parker, J.M. and Hodges, R.S.	Prediction of peptide retention times in reversed-phase high-performance liquid chromatography; I. determination of retention coefficients of amino acid residues of model synthetic peptides	J Chromatogr. 359, 499-517 (1986)
181	GUYH850101	Partition energy (Guy, 1985)	Guy, H.R.	Amino acid side-chain partition energies and distribution of residues in soluble proteins	Biophys. J. 47, 61-70 (1985)
182	GUYH850102	Apparent partition energies calculated from Wertz-Scheraga index (Guy, 1985)	Guy, H.R.	Amino acid side-chain partition energies and distribution of residues in soluble proteins	Biophys. J. 47, 61-70 (1985)
183	GUYH850104	Apparent partition energies calculated from Janin index (Guy, 1985)	Guy, H.R.	Amino acid side-chain partition energies and distribution of residues in soluble proteins	Biophys. J. 47, 61-70 (1985)
184	GUYH850105	Apparent partition energies calculated from Chothia index (Guy, 1985)	Guy, H.R.	Amino acid side-chain partition energies and distribution of residues in soluble proteins	Biophys. J. 47, 61-70 (1985)
185	HARY940101	Mean volumes of residues buried in protein interiors (Harpaz et al., 1994)	Harpaz, Y., Gerstein, M. and Chothia, C.	Volume changes on protein folding	Structure 2, 641-649 (1994)
186	HOPA770101	Hydration number (Hopfinger, 1971), Cited by Charton-Charton (1982)	Hopfinger, A.J.		Intermolecular Interactions and Biomolecular Organizations, Wiley, New York (1977) Cited by Charton-Charton (1982) (Cys !)
187	HOPT810101	Hydrophilicity value (Hopp-Woods, 1981)	Hopp, T.P. and Woods, K.R.	Prediction of protein antigenic determinants from amino acid sequecces	Proc. Natl. Acad. Sci. USA 78, 3824-3828 (1981)
188	HUTJ700101	Heat capacity (Hutchens, 1970)	Hutchens, J.O.	Heat capacities, absolute entropies, and entropies of formation of amino acids and related compounds	In "Handbook of Biochemistry", 2nd ed. (Sober, H.A., ed.), Chemical Rubber Co., Cleveland, Ohio, pp. B60-B61 (1970)
189	HUTJ700102	Absolute entropy (Hutchens, 1970)	Hutchens, J.O.	Heat capacities, absolute entropies, and entropies of formation of amino acids and related compounds	In "Handbook of Biochemistry", 2nd ed. (Sober, H.A., ed.), Chemical Rubber Co., Cleveland, Ohio, pp. B60-B61 (1970)
190	HUTJ700103	Entropy of formation (Hutchens, 1970)	Hutchens, J.O.	Heat capacities, absolute entropies, and entropies of formation of amino acids and related compounds	In "Handbook of Biochemistry", 2nd ed. (Sober, H.A., ed.), Chemical Rubber Co., Cleveland, Ohio, pp. B60-B61 (1970)
191	ISOY800101	Normalized relative frequency of alpha-helix (Isogai et al., 1980)	Isogai, Y., Nemethy, G., Rackovsky, S., Leach, S.J. and Scheraga,H.A	Characterization of multiple bends in proteins	Biopolymers 19, 1183-1210 (1980) Recalculated by Kidera using a different set of proteins
192	ISOY800102	Normalized relative frequency of extended structure (Isogai et al., 1980)	Isogai, Y., Nemethy, G., Rackovsky, S., Leach, S.J. and Scheraga,H.A	Characterization of multiple bends in proteins	Biopolymers 19, 1183-1210 (1980) Recalculated by Kidera using a different set of proteins
193	ISOY800103	Normalized relative frequency of bend (Isogai et al., 1980)	Isogai, Y., Nemethy, G., Rackovsky, S., Leach, S.J. and Scheraga,H.A	Characterization of multiple bends in proteins	Biopolymers 19, 1183-1210 (1980) Recalculated by Kidera using a different set of proteins
194	ISOY800104	Normalized relative frequency of bend R (Isogai et al., 1980)	Isogai, Y., Nemethy, G., Rackovsky, S., Leach, S.J. and Scheraga,H.A	Characterization of multiple bends in proteins	Biopolymers 19, 1183-1210 (1980) Recalculated by Kidera using a different set of proteins
195	ISOY800105	Normalized relative frequency of bend S (Isogai et al., 1980)	Isogai, Y., Nemethy, G., Rackovsky, S., Leach, S.J. and Scheraga,H.A	Characterization of multiple bends in proteins	Biopolymers 19, 1183-1210 (1980) Recalculated by Kidera using a different set of proteins
196	ISOY800106	Normalized relative frequency of helix end (Isogai et al., 1980)	Isogai, Y., Nemethy, G., Rackovsky, S., Leach, S.J. and Scheraga,H.A	Characterization of multiple bends in proteins	Biopolymers 19, 1183-1210 (1980) Recalculated by Kidera using a different set of proteins
197	ISOY800107	Normalized relative frequency of double bend (Isogai et al., 1980)	Isogai, Y., Nemethy, G., Rackovsky, S., Leach, S.J. and Scheraga,H.A	Characterization of multiple bends in proteins	Biopolymers 19, 1183-1210 (1980) Recalculated by Kidera using a different set of proteins
198	ISOY800108	Normalized relative frequency of coil (Isogai et al., 1980)	Isogai, Y., Nemethy, G., Rackovsky, S., Leach, S.J. and Scheraga,H.A	Characterization of multiple bends in proteins	Biopolymers 19, 1183-1210 (1980) Recalculated by Kidera using a different set of proteins
199	JACR890101	Weights from the IFH scale (Jacobs-White, 1989)	Jacobs, R. and White, S.H.	The nature of the hydrophobic bonding of small peptides at the bilayer interface: implications for the insertion of transbilayer helices	Biochemistry 28, 3421-3437 (1989)
200	JANJ780101	Average accessible surface area (Janin et al., 1978)	Janin, J., Wodak, S., Levitt, M. and Maigret, B.	Conformation of amino acid side-chains in proteins	J. Mol. Biol. 125, 357-386 (1978)
201	JANJ780102	Percentage of buried residues (Janin et al., 1978)	Janin, J., Wodak, S., Levitt, M. and Maigret, B.	Conformation of amino acid side-chains in proteins	J. Mol. Biol. 125, 357-386 (1978)
202	JANJ780103	Percentage of exposed residues (Janin et al., 1978)	Janin, J., Wodak, S., Levitt, M. and Maigret, B.	Conformation of amino acid side-chains in proteins	J. Mol. Biol. 125, 357-386 (1978)
203	JANJ790101	Ratio of buried and accessible molar fractions (Janin, 1979)	Janin, J.	Surface and inside volumes in globular proteins	Nature 277, 491-492 (1979)
204	JANJ790102	Transfer free energy (Janin, 1979)	Janin, J.	Surface and inside volumes in globular proteins	Nature 277, 491-492 (1979)
205	JOND750101	Hydrophobicity (Jones, 1975)	Jones, D.D.	Amino acid properties and side-chain orientation in proteins: A cross correlation approach	J. Theor. Biol. 50, 167-183 (1975)
206	JOND750102	pK (-COOH) (Jones, 1975)	Jones, D.D.	Amino acid properties and side-chain orientation in proteins: A cross correlation approach	J. Theor. Biol. 50, 167-183 (1975) Original reference of this data: McMeekin, T.L., Groves, M.L. and Hipp, N.J. In "Amino Acids and Serum Proteins" (Stekol, J.A., ed.), American Chemical Society, Washington, D.C., p. 54 (1964)
207	JOND920101	Relative frequency of occurrence (Jones et al., 1992)	Jones, D.T., Taylor, W.R. and Thornton, J.M.	The rapid generation of mutation data matrices from protein sequences	CABIOS 8, 275-282 (1992)
208	JOND920102	Relative mutability (Jones et al., 1992)	Jones, D.T., Taylor, W.R. and Thornton, J.M.	The rapid generation of mutation data matrices from protein sequences	CABIOS 8, 275-282 (1992)
209	JUKT750101	Amino acid distribution (Jukes et al., 1975)	Jukes, T.H., Holmquist, R. and Moise, H.	Amino acid composition of proteins: Selection against the genetic code	Science 189, 50-51 (1975)
210	JUNJ780101	Sequence frequency (Jungck, 1978)	Jungck, J.R.	The genetic code as a periodic table	J. Mol. Evol. 11, 211-224 (1978)
211	JURD980101	Modified Kyte-Doolittle hydrophobicity scale (Juretic et al., 1998)	Juretic, D., Lucic, B., Zucic, D. and Trinajstic, N.	Protein transmembrane structure: recognition and prediction by using hydrophobicity scales through preference functions	Theoretical and Computational Chemistry, 5, 405-445 (1998)
212	KANM800101	Average relative probability of helix (Kanehisa-Tsong, 1980)	Kanehisa, M.I. and Tsong, T.Y.	Local hydrophobicity stabilizes secondary structures in proteins	Biopolymers 19, 1617-1628 (1980)
213	KANM800102	Average relative probability of beta-sheet (Kanehisa-Tsong, 1980)	Kanehisa, M.I. and Tsong, T.Y.	Local hydrophobicity stabilizes secondary structures in proteins	Biopolymers 19, 1617-1628 (1980)
214	KANM800103	Average relative probability of inner helix (Kanehisa-Tsong, 1980)	Kanehisa, M.I. and Tsong, T.Y.	Local hydrophobicity stabilizes secondary structures in proteins	Biopolymers 19, 1617-1628 (1980)
215	KANM800104	Average relative probability of inner beta-sheet (Kanehisa-Tsong, 1980)	Kanehisa, M.I. and Tsong, T.Y.	Local hydrophobicity stabilizes secondary structures in proteins	Biopolymers 19, 1617-1628 (1980)
216	KARP850101	Flexibility parameter for no rigid neighbors (Karplus-Schulz, 1985)	Karplus, P.A. and Schulz, G.E.	Prediction of chain flexibility in proteins	Naturwiss. 72, 212-213 (1985)
217	KARP850102	Flexibility parameter for one rigid neighbor (Karplus-Schulz, 1985)	Karplus, P.A. and Schulz, G.E.	Prediction of chain flexibility in proteins	Naturwiss. 72, 212-213 (1985)
218	KARP850103	Flexibility parameter for two rigid neighbors (Karplus-Schulz, 1985)	Karplus, P.A. and Schulz, G.E.	Prediction of chain flexibility in proteins	Naturwiss. 72, 212-213 (1985)
219	KHAG800101	The Kerr-constant increments (Khanarian-Moore, 1980)	Khanarian, G. and Moore, W.J.	The Kerr effect of amino acids in water	Aust. J. Chem. 33, 1727-1741 (1980)
220	KIDA850101	Hydrophobicity-related index (Kidera et al., 1985)	Kidera, A., Konishi, Y., Oka, M., Ooi, T. and Scheraga, A.	Statistical Analysis of the Physical Properties of the 20 Naturally Occuring Amino Acids	J. Prot. Chem. 4, 23-55 (1985)
221	KIMC930101	Thermodynamic beta sheet propensity (Kim-Berg, 1993)	Kim, C.A. and Berg, J.M.	Thermodynamic beta-sheet propensities measured using a zinc-finger host peptide	Nature 362, 267-270 (1993)
222	KLEP840101	Net charge (Klein et al., 1984)	Klein, P., Kanehisa, M. and DeLisi, C.	Prediction of protein function from sequence properties: Discriminant analysis of a data base	Biochim. Biophys. Acta 787, 221-226 (1984)
223	KOEP990101	Alpha-helix propensity derived from designed sequences (Koehl-Levitt, 1999)	Koehl, P. and Levitt, M.	Structure-based conformational preferences of amino acids	Proc Natl Acad Sci U S A. 96, 12524-12529 (1999)
224	KOEP990102	Beta-sheet propensity derived from designed sequences (Koehl-Levitt, 1999)	Koehl, P. and Levitt, M.	Structure-based conformational preferences of amino acids	Proc Natl Acad Sci U S A. 96, 12524-12529 (1999)
225	KRIW710101	Side chain interaction parameter (Krigbaum-Rubin, 1971)	Krigbaum, W.R. and Rubin, B.H.	Local interactions as structure determinant for globular proteins	Biochim. Biophys. Acta 229, 368-383 (1971)
226	KRIW790101	Side chain interaction parameter (Krigbaum-Komoriya, 1979)	Krigbaum, W.R. and Komoriya, A.	Local interactions as a structure determinant for protein molecules: II	Biochim. Biophys. Acta 576, 204-228 (1979)
227	KRIW790102	Fraction of site occupied by water (Krigbaum-Komoriya, 1979)	Krigbaum, W.R. and Komoriya, A.	Local interactions as a structure determinant for protein molecules: II	Biochim. Biophys. Acta 576, 204-228 (1979)
228	KRIW790103	Side chain volume (Krigbaum-Komoriya, 1979)	Krigbaum, W.R. and Komoriya, A.	Local interactions as a structure determinant for protein molecules: II	Biochim. Biophys. Acta 576, 204-228 (1979)
229	KUHL950101	Hydrophilicity scale (Kuhn et al., 1995)	Kuhn, L.A., Swanson, C.A., Pique, M.E., Tainer, J.A. and Getzoff, E.D.	Atomic and residue hydrophilicity in the context of folded protein structures	Proteins 23, 536-547 (1995)
230	KUMS000101	Distribution of amino acid residues in the 18 non-redundant families of thermophilic proteins (Kumar et al., 2000)	Kumar, S., Tsai, C.J. and Nussinov, R.	Factors enhancing protein thermostability	Protein Eng. 13, 179-191 (2000)
231	KUMS000102	Distribution of amino acid residues in the 18 non-redundant families of mesophilic proteins (Kumar et al., 2000)	Kumar, S., Tsai, C.J. and Nussinov, R.	Factors enhancing protein thermostability	Protein Eng. 13, 179-191 (2000)
232	KUMS000103	Distribution of amino acid residues in the alpha-helices in thermophilic proteins (Kumar et al., 2000)	Kumar, S., Tsai, C.J. and Nussinov, R.	Factors enhancing protein thermostability	Protein Eng. 13, 179-191 (2000)
233	KUMS000104	Distribution of amino acid residues in the alpha-helices in mesophilic proteins (Kumar et al., 2000)	Kumar, S., Tsai, C.J. and Nussinov, R.	Factors enhancing protein thermostability	Protein Eng. 13, 179-191 (2000)
234	KYTJ820101	Hydropathy index (Kyte-Doolittle, 1982)	Kyte, J. and Doolittle, R.F.	A simple method for displaying the hydropathic character of a protein	J. Mol. Biol. 157, 105-132 (1982)
235	LAWE840101	Transfer free energy, CHP/water (Lawson et al., 1984)	Lawson, E.Q., Sadler, A.J., Harmatz, D., Brandau, D.T., Micanovic, R. MacElroy, R.D. and Middaught, C.R.	A simple experimental model for hydrophobic interactions in proteins	J. Biol. Chem. 259, 2910-2912 (1984)
236	LEVM760101	Hydrophobic parameter (Levitt, 1976)	Levitt, M.	A simplified representation of protein conformations for rapid simulation of protein folfing	J. Mol. Biol. 104, 59-107 (1976)
237	LEVM760102	Distance between C-alpha and centroid of side chain (Levitt, 1976)	Levitt, M.	A simplified representation of protein conformations for rapid simulation of protein folfing	J. Mol. Biol. 104, 59-107 (1976)
238	LEVM760103	Side chain angle theta(AAR) (Levitt, 1976)	Levitt, M.	A simplified representation of protein conformations for rapid simulation of protein folfing	J. Mol. Biol. 104, 59-107 (1976) (Gly missing)
239	LEVM760104	Side chain torsion angle phi(AAAR) (Levitt, 1976)	Levitt, M.	A simplified representation of protein conformations for rapid simulation of protein folfing	J. Mol. Biol. 104, 59-107 (1976)
240	LEVM760105	Radius of gyration of side chain (Levitt, 1976)	Levitt, M.	A simplified representation of protein conformations for rapid simulation of protein folfing	J. Mol. Biol. 104, 59-107 (1976) (Gly 0.089)
241	LEVM760106	van der Waals parameter R0 (Levitt, 1976)	Levitt, M.	A simplified representation of protein conformations for rapid simulation of protein folfing	J. Mol. Biol. 104, 59-107 (1976)
242	LEVM760107	van der Waals parameter epsilon (Levitt, 1976)	Levitt, M.	A simplified representation of protein conformations for rapid simulation of protein folfing	J. Mol. Biol. 104, 59-107 (1976)
243	LEVM780101	Normalized frequency of alpha-helix, with weights (Levitt, 1978)	Levitt, M.	Conformational preferences of amino acids in globular proteins	Biochemistry 17, 4277-4285 (1978)
244	LEVM780102	Normalized frequency of beta-sheet, with weights (Levitt, 1978)	Levitt, M.	Conformational preferences of amino acids in globular proteins	Biochemistry 17, 4277-4285 (1978)
245	LEVM780103	Normalized frequency of reverse turn, with weights (Levitt, 1978)	Levitt, M.	Conformational preferences of amino acids in globular proteins	Biochemistry 17, 4277-4285 (1978)
246	LEVM780104	Normalized frequency of alpha-helix, unweighted (Levitt, 1978)	Levitt, M.	Conformational preferences of amino acids in globular proteins	Biochemistry 17, 4277-4285 (1978)
247	LEVM780105	Normalized frequency of beta-sheet, unweighted (Levitt, 1978)	Levitt, M.	Conformational preferences of amino acids in globular proteins	Biochemistry 17, 4277-4285 (1978)
248	LEVM780106	Normalized frequency of reverse turn, unweighted (Levitt, 1978)	Levitt, M.	Conformational preferences of amino acids in globular proteins	Biochemistry 17, 4277-4285 (1978)
249	LEWP710101	Frequency of occurrence in beta-bends (Lewis et al., 1971)	Lewis, P. N., Momany, F.A. and Scheraga, H.A.	Folding of polypeptide chains in proteins: A proposed mechanism for folding	Proc. Natl. Acad. Sci. USA 68, 2293-2297 (1971)
250	LIFS790101	Conformational preference for all beta-strands (Lifson-Sander, 1979)	Lifson, S. and Sander, C.	Antiparallel and parallel beta-strands differ in amino acid residue preference	Nature 282, 109-111 (1979)
251	LIFS790102	Conformational preference for parallel beta-strands (Lifson-Sander, 1979)	Lifson, S. and Sander, C.	Antiparallel and parallel beta-strands differ in amino acid residue preference	Nature 282, 109-111 (1979)
252	LIFS790103	Conformational preference for antiparallel beta-strands (Lifson-Sander, 1979)	Lifson, S. and Sander, C.	Antiparallel and parallel beta-strands differ in amino acid residue preference	Nature 282, 109-111 (1979)
253	MANP780101	Average surrounding hydrophobicity (Manavalan-Ponnuswamy, 1978)	Manavalan, P. and Ponnuswamy, P.K.	Hydrophobic character of amino acid residues in globular proteins	Nature 275, 673-674 (1978)
254	MAXF760101	Normalized frequency of alpha-helix (Maxfield-Scheraga, 1976)	Maxfield, F.R. and Scheraga, H.A.	Status of empirical methods for the prediction of protein backbone topography	Biochemistry 15, 5138-5153 (1976)
255	MAXF760102	Normalized frequency of extended structure (Maxfield-Scheraga, 1976)	Maxfield, F.R. and Scheraga, H.A.	Status of empirical methods for the prediction of protein backbone topography	Biochemistry 15, 5138-5153 (1976)
256	MAXF760103	Normalized frequency of zeta R (Maxfield-Scheraga, 1976)	Maxfield, F.R. and Scheraga, H.A.	Status of empirical methods for the prediction of protein backbone topography	Biochemistry 15, 5138-5153 (1976)
257	MAXF760104	Normalized frequency of left-handed alpha-helix (Maxfield-Scheraga, 1976)	Maxfield, F.R. and Scheraga, H.A.	Status of empirical methods for the prediction of protein backbone topography	Biochemistry 15, 5138-5153 (1976)
258	MAXF760105	Normalized frequency of zeta L (Maxfield-Scheraga, 1976)	Maxfield, F.R. and Scheraga, H.A.	Status of empirical methods for the prediction of protein backbone topography	Biochemistry 15, 5138-5153 (1976)
259	MAXF760106	Normalized frequency of alpha region (Maxfield-Scheraga, 1976)	Maxfield, F.R. and Scheraga, H.A.	Status of empirical methods for the prediction of protein backbone topography	Biochemistry 15, 5138-5153 (1976)
260	MCMT640101	Refractivity (McMeekin et al., 1964), Cited by Jones (1975)	McMeekin, T.L., Groves, M.L. and Hipp, N.J.		In "Amino Acids and Serum Proteins" (Stekol, J.A., ed.), American Chemical Society, Washington, D.C., p. 54 (1964)
261	MEEJ800101	Retention coefficient in HPLC, pH7.4 (Meek, 1980)	Meek, J.L.	Prediction of peptide retention times in high-pressure liquid chromatography on the basis of amino acid composition	Proc. Natl. Acad. Sci. USA 77, 1632-1636 (1980)
262	MEEJ800102	Retention coefficient in HPLC, pH2.1 (Meek, 1980)	Meek, J.L.	Prediction of peptide retention times in high-pressure liquid chromatography on the basis of amino acid composition	Proc. Natl. Acad. Sci. USA 77, 1632-1636 (1980)
263	MEEJ810101	Retention coefficient in NaClO4 (Meek-Rossetti, 1981)	Meek, J.L. and Rossetti, Z.L.	Factors affecting retention and resolution of peptides in high-performance liquid chromatography	J. Chromatogr. 211, 15-28 (1981)
264	MEEJ810102	Retention coefficient in NaH2PO4 (Meek-Rossetti, 1981)	Meek, J.L. and Rossetti, Z.L.	Factors affecting retention and resolution of peptides in high-performance liquid chromatography	J. Chromatogr. 211, 15-28 (1981)
265	MEIH800101	Average reduced distance for C-alpha (Meirovitch et al., 1980)	Meirovitch, H., Rackovsky, S. and Scheraga, H.A.	Empirical studies of hydrophobicity. 1. Effect of protein size on the hydrophobic behavior of amino acids	Macromolecules 13, 1398-1405 (1980)
266	MEIH800102	Average reduced distance for side chain (Meirovitch et al., 1980)	Meirovitch, H., Rackovsky, S. and Scheraga, H.A.	Empirical studies of hydrophobicity. 1. Effect of protein size on the hydrophobic behavior of amino acids	Macromolecules 13, 1398-1405 (1980)
267	MEIH800103	Average side chain orientation angle (Meirovitch et al., 1980)	Meirovitch, H., Rackovsky, S. and Scheraga, H.A.	Empirical studies of hydrophobicity. 1. Effect of protein size on the hydrophobic behavior of amino acids	Macromolecules 13, 1398-1405 (1980)
268	MITS020101	Amphiphilicity index (Mitaku et al., 2002)	Mitaku, S., Hirokawa, T. and Tsuji, T.	Amphiphilicity index of polar amino acids as an aid in the characterization of amino acid preference at membrane-water interfaces	Bioinformatics. 18, 608-616 (2002)
269	MIYS850101	Effective partition energy (Miyazawa-Jernigan, 1985)	Miyazawa, S. and Jernigan, R.L.	Estimation of effective interresidue contact energies from protein crystal structures: Quasi-chemical approximation	Macromolecules 18, 534-552 (1985)
270	MIYS990101	Relative partition energies derived by the Bethe approximation (Miyazawa-Jernigan, 1999)	Miyazawa, S. and Jernigan, R. L.	Self-consistent estimation of inter-residue protein contact energies based on an equilibrium mixture approximation of residues	Proteins 34, 49-68 (1999)
271	MIYS990102	Optimized relative partition energies - method A (Miyazawa-Jernigan, 1999)	Miyazawa, S. and Jernigan, R. L.	Self-consistent estimation of inter-residue protein contact energies based on an equilibrium mixture approximation of residues	Proteins 34, 49-68 (1999)
272	MIYS990103	Optimized relative partition energies - method B (Miyazawa-Jernigan, 1999)	Miyazawa, S. and Jernigan, R. L.	Self-consistent estimation of inter-residue protein contact energies based on an equilibrium mixture approximation of residues	Proteins 34, 49-68 (1999)
273	MIYS990104	Optimized relative partition energies - method C (Miyazawa-Jernigan, 1999)	Miyazawa, S. and Jernigan, R. L.	Self-consistent estimation of inter-residue protein contact energies based on an equilibrium mixture approximation of residues	Proteins 34, 49-68 (1999)
274	MIYS990105	Optimized relative partition energies - method D (Miyazawa-Jernigan, 1999)	Miyazawa, S. and Jernigan, R. L.	Self-consistent estimation of inter-residue protein contact energies based on an equilibrium mixture approximation of residues	Proteins 34, 49-68 (1999)
275	MONM990101	Turn propensity scale for transmembrane helices (Monne et al., 1999)	Monne, M., Hermansson, M. and von Heijne, G.	A turn propensity scale for transmembrane helices	J. Mol. Biol. 288, 141-145 (1999)
276	MONM990201	Averaged turn propensities in a transmembrane helix (Monne et al., 1999)	Monne, M., Nilsson, I., Elofsson, A. and von Heijne, G.	Turns in transmembrane helices: determination of the minimal length of a "helical hairpin" and derivation of a fine-grained turn propensity scale	J. Mol. Biol. 293, 807-814 (1999)
277	MUNV940101	Free energy in alpha-helical conformation (Munoz-Serrano, 1994)	Munoz, V. and Serrano, L.	Intrinsic secondary structure propensities of the amino acids, using statistical phi-psi matrices: comparison with experimental scales	Proteins 20, 301-311 (1994)
278	MUNV940102	Free energy in alpha-helical region (Munoz-Serrano, 1994)	Munoz, V. and Serrano, L.	Intrinsic secondary structure propensities of the amino acids, using statistical phi-psi matrices: comparison with experimental scales	Proteins 20, 301-311 (1994)
279	MUNV940103	Free energy in beta-strand conformation (Munoz-Serrano, 1994)	Munoz, V. and Serrano, L.	Intrinsic secondary structure propensities of the amino acids, using statistical phi-psi matrices: comparison with experimental scales	Proteins 20, 301-311 (1994)
280	MUNV940104	Free energy in beta-strand region (Munoz-Serrano, 1994)	Munoz, V. and Serrano, L.	Intrinsic secondary structure propensities of the amino acids, using statistical phi-psi matrices: comparison with experimental scales	Proteins 20, 301-311 (1994)
281	MUNV940105	Free energy in beta-strand region (Munoz-Serrano, 1994)	Munoz, V. and Serrano, L.	Intrinsic secondary structure propensities of the amino acids, using statistical phi-psi matrices: comparison with experimental scales	Proteins 20, 301-311 (1994)
282	NADH010101	Hydropathy scale based on self-information values in the two-state model (5% accessibility) (Naderi-Manesh et al., 2001)	Naderi-Manesh, H., Sadeghi, M., Arab, S. and Moosavi Movahedi, A.A.	Prediction of protein surface accessibility with information theory	Proteins 42, 452-459 (2001)
283	NADH010102	Hydropathy scale based on self-information values in the two-state model (9% accessibility) (Naderi-Manesh et al., 2001)	Naderi-Manesh, H., Sadeghi, M., Arab, S. and Moosavi Movahedi, A.A.	Prediction of protein surface accessibility with information theory	Proteins 42, 452-459 (2001)
284	NADH010103	Hydropathy scale based on self-information values in the two-state model (16% accessibility) (Naderi-Manesh et al., 2001)	Naderi-Manesh, H., Sadeghi, M., Arab, S. and Moosavi Movahedi, A.A.	Prediction of protein surface accessibility with information theory	Proteins 42, 452-459 (2001)
285	NADH010104	Hydropathy scale based on self-information values in the two-state model (20% accessibility) (Naderi-Manesh et al., 2001)	Naderi-Manesh, H., Sadeghi, M., Arab, S. and Moosavi Movahedi, A.A.	Prediction of protein surface accessibility with information theory	Proteins 42, 452-459 (2001)
286	NADH010105	Hydropathy scale based on self-information values in the two-state model (25% accessibility) (Naderi-Manesh et al., 2001)	Naderi-Manesh, H., Sadeghi, M., Arab, S. and Moosavi Movahedi, A.A.	Prediction of protein surface accessibility with information theory	Proteins 42, 452-459 (2001)
287	NADH010106	Hydropathy scale based on self-information values in the two-state model (36% accessibility) (Naderi-Manesh et al., 2001)	Naderi-Manesh, H., Sadeghi, M., Arab, S. and Moosavi Movahedi, A.A.	Prediction of protein surface accessibility with information theory	Proteins 42, 452-459 (2001)
288	NADH010107	Hydropathy scale based on self-information values in the two-state model (50% accessibility) (Naderi-Manesh et al., 2001)	Naderi-Manesh, H., Sadeghi, M., Arab, S. and Moosavi Movahedi, A.A.	Prediction of protein surface accessibility with information theory	Proteins 42, 452-459 (2001)
289	NAGK730101	Normalized frequency of alpha-helix (Nagano, 1973)	Nagano, K.	Local analysis of the mechanism of protein folding. I. Prediction of helices, loops, and beta-structures from primary structure	J. Mol. Biol. 75, 401-420 (1973)
290	NAGK730102	Normalized frequency of bata-structure (Nagano, 1973)	Nagano, K.	Local analysis of the mechanism of protein folding. I. Prediction of helices, loops, and beta-structures from primary structure	J. Mol. Biol. 75, 401-420 (1973)
291	NAGK730103	Normalized frequency of coil (Nagano, 1973)	Nagano, K.	Local analysis of the mechanism of protein folding. I. Prediction of helices, loops, and beta-structures from primary structure	J. Mol. Biol. 75, 401-420 (1973)
292	NAKH900101	AA composition of total proteins (Nakashima et al., 1990)	Nakashima, H., Nishikawa, K. and Ooi, T.	Distinct character in hydrophobicity of amino acid composition of mitochondrial proteins	Proteins 8, 173-178 (1990)
293	NAKH900102	SD of AA composition of total proteins (Nakashima et al., 1990)	Nakashima, H., Nishikawa, K. and Ooi, T.	Distinct character in hydrophobicity of amino acid composition of mitochondrial proteins	Proteins 8, 173-178 (1990)
294	NAKH900103	AA composition of mt-proteins (Nakashima et al., 1990)	Nakashima, H., Nishikawa, K. and Ooi, T.	Distinct character in hydrophobicity of amino acid composition of mitochondrial proteins	Proteins 8, 173-178 (1990)
295	NAKH900104	Normalized composition of mt-proteins (Nakashima et al., 1990)	Nakashima, H., Nishikawa, K. and Ooi, T.	Distinct character in hydrophobicity of amino acid composition of mitochondrial proteins	Proteins 8, 173-178 (1990)
296	NAKH900105	AA composition of mt-proteins from animal (Nakashima et al., 1990)	Nakashima, H., Nishikawa, K. and Ooi, T.	Distinct character in hydrophobicity of amino acid composition of mitochondrial proteins	Proteins 8, 173-178 (1990)
297	NAKH900106	Normalized composition from animal (Nakashima et al., 1990)	Nakashima, H., Nishikawa, K. and Ooi, T.	Distinct character in hydrophobicity of amino acid composition of mitochondrial proteins	Proteins 8, 173-178 (1990)
298	NAKH900107	AA composition of mt-proteins from fungi and plant (Nakashima et al., 1990)	Nakashima, H., Nishikawa, K. and Ooi, T.	Distinct character in hydrophobicity of amino acid composition of mitochondrial proteins	Proteins 8, 173-178 (1990)
299	NAKH900108	Normalized composition from fungi and plant (Nakashima et al., 1990)	Nakashima, H., Nishikawa, K. and Ooi, T.	Distinct character in hydrophobicity of amino acid composition of mitochondrial proteins	Proteins 8, 173-178 (1990)
300	NAKH900109	AA composition of membrane proteins (Nakashima et al., 1990)	Nakashima, H., Nishikawa, K. and Ooi, T.	Distinct character in hydrophobicity of amino acid composition of mitochondrial proteins	Proteins 8, 173-178 (1990)
301	NAKH900110	Normalized composition of membrane proteins (Nakashima et al., 1990)	Nakashima, H., Nishikawa, K. and Ooi, T.	Distinct character in hydrophobicity of amino acid composition of mitochondrial proteins	Proteins 8, 173-178 (1990)
302	NAKH900111	Transmembrane regions of non-mt-proteins (Nakashima et al., 1990)	Nakashima, H., Nishikawa, K. and Ooi, T.	Distinct character in hydrophobicity of amino acid composition of mitochondrial proteins	Proteins 8, 173-178 (1990)
303	NAKH900112	Transmembrane regions of mt-proteins (Nakashima et al., 1990)	Nakashima, H., Nishikawa, K. and Ooi, T.	Distinct character in hydrophobicity of amino acid composition of mitochondrial proteins	Proteins 8, 173-178 (1990)
304	NAKH900113	Ratio of average and computed composition (Nakashima et al., 1990)	Nakashima, H., Nishikawa, K. and Ooi, T.	Distinct character in hydrophobicity of amino acid composition of mitochondrial proteins	Proteins 8, 173-178 (1990)
305	NAKH920101	AA composition of CYT of single-spanning proteins (Nakashima-Nishikawa, 1992)	Nakashima, H. and Nishikawa, K.	The amino acid composition is different between the cytoplasmic and extracellular sides in membrane proteins	FEBS Lett. 303, 141-146 (1992)
306	NAKH920102	AA composition of CYT2 of single-spanning proteins (Nakashima-Nishikawa, 1992)	Nakashima, H. and Nishikawa, K.	The amino acid composition is different between the cytoplasmic and extracellular sides in membrane proteins	FEBS Lett. 303, 141-146 (1992)
307	NAKH920103	AA composition of EXT of single-spanning proteins (Nakashima-Nishikawa, 1992)	Nakashima, H. and Nishikawa, K.	The amino acid composition is different between the cytoplasmic and extracellular sides in membrane proteins	FEBS Lett. 303, 141-146 (1992)
308	NAKH920104	AA composition of EXT2 of single-spanning proteins (Nakashima-Nishikawa, 1992)	Nakashima, H. and Nishikawa, K.	The amino acid composition is different between the cytoplasmic and extracellular sides in membrane proteins	FEBS Lett. 303, 141-146 (1992)
309	NAKH920105	AA composition of MEM of single-spanning proteins (Nakashima-Nishikawa, 1992)	Nakashima, H. and Nishikawa, K.	The amino acid composition is different between the cytoplasmic and extracellular sides in membrane proteins	FEBS Lett. 303, 141-146 (1992)
310	NAKH920106	AA composition of CYT of multi-spanning proteins (Nakashima-Nishikawa, 1992)	Nakashima, H. and Nishikawa, K.	The amino acid composition is different between the cytoplasmic and extracellular sides in membrane proteins	FEBS Lett. 303, 141-146 (1992)
311	NAKH920107	AA composition of EXT of multi-spanning proteins (Nakashima-Nishikawa, 1992)	Nakashima, H. and Nishikawa, K.	The amino acid composition is different between the cytoplasmic and extracellular sides in membrane proteins	FEBS Lett. 303, 141-146 (1992)
312	NAKH920108	AA composition of MEM of multi-spanning proteins (Nakashima-Nishikawa, 1992)	Nakashima, H. and Nishikawa, K.	The amino acid composition is different between the cytoplasmic and extracellular sides in membrane proteins	FEBS Lett. 303, 141-146 (1992)
313	NISK800101	8 A contact number (Nishikawa-Ooi, 1980)	Nishikawa, K. and Ooi, T.	Prediction of the surface-interior diagram of globular proteins by an empirical method	Int. J. Peptide Protein Res. 16, 19-32 (1980)
314	NISK860101	14 A contact number (Nishikawa-Ooi, 1986)	Nishikawa, K. and Ooi, T.	Radial locations of amino acid residues in a globular protein: Correlation with the sequence	J. Biochem. 100, 1043-1047 (1986)
315	NOZY710101	Transfer energy, organic solvent/water (Nozaki-Tanford, 1971)	Nozaki, Y. and Tanford, C.	The solubility of amino acids and two glycine peptides in aqueous ethanol and dioxane solutions	J. Biol. Chem. 246, 2211-2217 (1971)
316	OLSK800101	Average internal preferences (Olsen, 1980)	Olsen, K.W.	Internal residue criteria for predicting three-dimensional protein structures	Biochim. Biophys. Acta 622, 259-267 (1980)
317	ONEK900101	Delta G values for the peptides extrapolated to 0 M urea (O'Neil-DeGrado, 1990)	O'Neil, K.T. and DeGrado, W.F.	A thermodynamic scale for the helix-forming tendencies of the commonly occurring amino acids	Science 250, 646-651 (1990)
318	ONEK900102	Helix formation parameters (delta delta G) (O'Neil-DeGrado, 1990)	O'Neil, K.T. and DeGrado, W.F.	A thermodynamic scale for the helix-forming tendencies of the commonly occurring amino acids	Science 250, 646-651 (1990)
319	OOBM770101	Average non-bonded energy per atom (Oobatake-Ooi, 1977)	Oobatake, M. and Ooi, T.	An analysis of non-bonded energy of proteins	J. Theor. Biol. 67, 567-584 (1977)
320	OOBM770102	Short and medium range non-bonded energy per atom (Oobatake-Ooi, 1977)	Oobatake, M. and Ooi, T.	An analysis of non-bonded energy of proteins	J. Theor. Biol. 67, 567-584 (1977)
321	OOBM770103	Long range non-bonded energy per atom (Oobatake-Ooi, 1977)	Oobatake, M. and Ooi, T.	An analysis of non-bonded energy of proteins	J. Theor. Biol. 67, 567-584 (1977)
322	OOBM770104	Average non-bonded energy per residue (Oobatake-Ooi, 1977)	Oobatake, M. and Ooi, T.	An analysis of non-bonded energy of proteins	J. Theor. Biol. 67, 567-584 (1977)
323	OOBM770105	Short and medium range non-bonded energy per residue (Oobatake-Ooi, 1977)	Oobatake, M. and Ooi, T.	An analysis of non-bonded energy of proteins	J. Theor. Biol. 67, 567-584 (1977)
324	OOBM850101	Optimized beta-structure-coil equilibrium constant (Oobatake et al., 1985)	Oobatake, M., Kubota, Y. and Ooi, T.	Optimization of amino acid parameters for correspondence of sequence to tertiary structures of proteuins	Bull. Inst. Chem. Res., Kyoto Univ. 63, 82-94 (1985)
325	OOBM850102	Optimized propensity to form reverse turn (Oobatake et al., 1985)	Oobatake, M., Kubota, Y. and Ooi, T.	Optimization of amino acid parameters for correspondence of sequence to tertiary structures of proteuins	Bull. Inst. Chem. Res., Kyoto Univ. 63, 82-94 (1985)
326	OOBM850103	Optimized transfer energy parameter (Oobatake et al., 1985)	Oobatake, M., Kubota, Y. and Ooi, T.	Optimization of amino acid parameters for correspondence of sequence to tertiary structures of proteuins	Bull. Inst. Chem. Res., Kyoto Univ. 63, 82-94 (1985)
327	OOBM850104	Optimized average non-bonded energy per atom (Oobatake et al., 1985)	Oobatake, M., Kubota, Y. and Ooi, T.	Optimization of amino acid parameters for correspondence of sequence to tertiary structures of proteuins	Bull. Inst. Chem. Res., Kyoto Univ. 63, 82-94 (1985)
328	OOBM850105	Optimized side chain interaction parameter (Oobatake et al., 1985)	Oobatake, M., Kubota, Y. and Ooi, T.	Optimization of amino acid parameters for correspondence of sequence to tertiary structures of proteuins	Bull. Inst. Chem. Res., Kyoto Univ. 63, 82-94 (1985)
329	PALJ810101	Normalized frequency of alpha-helix from LG (Palau et al., 1981)	Palau, J., Argos, P. and Puigdomenech, P.	Protein secondary structure	Int. J. Peptide Protein Res. 19, 394-401 (1981)
330	PALJ810102	Normalized frequency of alpha-helix from CF (Palau et al., 1981)	Palau, J., Argos, P. and Puigdomenech, P.	Protein secondary structure	Int. J. Peptide Protein Res. 19, 394-401 (1981)
331	PALJ810103	Normalized frequency of beta-sheet from LG (Palau et al., 1981)	Palau, J., Argos, P. and Puigdomenech, P.	Protein secondary structure	Int. J. Peptide Protein Res. 19, 394-401 (1981)
332	PALJ810104	Normalized frequency of beta-sheet from CF (Palau et al., 1981)	Palau, J., Argos, P. and Puigdomenech, P.	Protein secondary structure	Int. J. Peptide Protein Res. 19, 394-401 (1981)
333	PALJ810105	Normalized frequency of turn from LG (Palau et al., 1981)	Palau, J., Argos, P. and Puigdomenech, P.	Protein secondary structure	Int. J. Peptide Protein Res. 19, 394-401 (1981)
334	PALJ810106	Normalized frequency of turn from CF (Palau et al., 1981)	Palau, J., Argos, P. and Puigdomenech, P.	Protein secondary structure	Int. J. Peptide Protein Res. 19, 394-401 (1981)
335	PALJ810107	Normalized frequency of alpha-helix in all-alpha class (Palau et al., 1981)	Palau, J., Argos, P. and Puigdomenech, P.	Protein secondary structure	Int. J. Peptide Protein Res. 19, 394-401 (1981)
336	PALJ810108	Normalized frequency of alpha-helix in alpha+beta class (Palau et al., 1981)	Palau, J., Argos, P. and Puigdomenech, P.	Protein secondary structure	Int. J. Peptide Protein Res. 19, 394-401 (1981)
337	PALJ810109	Normalized frequency of alpha-helix in alpha/beta class (Palau et al., 1981)	Palau, J., Argos, P. and Puigdomenech, P.	Protein secondary structure	Int. J. Peptide Protein Res. 19, 394-401 (1981)
338	PALJ810110	Normalized frequency of beta-sheet in all-beta class (Palau et al., 1981)	Palau, J., Argos, P. and Puigdomenech, P.	Protein secondary structure	Int. J. Peptide Protein Res. 19, 394-401 (1981)
339	PALJ810111	Normalized frequency of beta-sheet in alpha+beta class (Palau et al., 1981)	Palau, J., Argos, P. and Puigdomenech, P.	Protein secondary structure	Int. J. Peptide Protein Res. 19, 394-401 (1981)
340	PALJ810112	Normalized frequency of beta-sheet in alpha/beta class (Palau et al., 1981)	Palau, J., Argos, P. and Puigdomenech, P.	Protein secondary structure	Int. J. Peptide Protein Res. 19, 394-401 (1981)
341	PALJ810113	Normalized frequency of turn in all-alpha class (Palau et al., 1981)	Palau, J., Argos, P. and Puigdomenech, P.	Protein secondary structure	Int. J. Peptide Protein Res. 19, 394-401 (1981)
342	PALJ810114	Normalized frequency of turn in all-beta class (Palau et al., 1981)	Palau, J., Argos, P. and Puigdomenech, P.	Protein secondary structure	Int. J. Peptide Protein Res. 19, 394-401 (1981)
343	PALJ810115	Normalized frequency of turn in alpha+beta class (Palau et al., 1981)	Palau, J., Argos, P. and Puigdomenech, P.	Protein secondary structure	Int. J. Peptide Protein Res. 19, 394-401 (1981)
344	PALJ810116	Normalized frequency of turn in alpha/beta class (Palau et al., 1981)	Palau, J., Argos, P. and Puigdomenech, P.	Protein secondary structure	Int. J. Peptide Protein Res. 19, 394-401 (1981)
345	PARJ860101	HPLC parameter (Parker et al., 1986)	Parker, J.M.R., Guo, D. and Hodges, R.S.	New hydrophilicity scale derived from high-performance liquid chromatography peptide retention data: Correlation of predicted surface residues with antigencity and x-ray-derived accessible sites	Biochemistry 25, 5425-5432 (1986)
346	PARS000101	p-Values of mesophilic proteins based on the distributions of B values (Parthasarathy-Murthy, 2000)	Parthasarathy, S. and Murthy, M.R.	Protein thermal stability: insights from atomic displacement parameters (B values)	Protein Eng. 13, 9-13 (2000)
347	PARS000102	p-Values of thermophilic proteins based on the distributions of B values (Parthasarathy-Murthy, 2000)	Parthasarathy, S. and Murthy, M.R.	Protein thermal stability: insights from atomic displacement parameters (B values)	Protein Eng. 13, 9-13 (2000)
348	PLIV810101	Partition coefficient (Pliska et al., 1981)	Pliska, V., Schmidt, M. and Fauchere, J.L.	Partition coefficients of amino acids and hydrophobic parameters pi of their side-chains as measured by thin-layer chromatography	J. Chromatogr. 216, 79-92 (1981)
349	PONJ960101	Average volumes of residues (Pontius et al., 1996)	Pontius, J., Richelle, J. and Wodak, S.J.	Deviations from standard atomic volumes as a quality measure for protein crystal structures	J. Mol. Biol 264, 121-136 (1996)
350	PONP800101	Surrounding hydrophobicity in folded form (Ponnuswamy et al., 1980)	Ponnuswamy, P.K., Prabhakaran, M. and Manavalan, P.	Hydrophobic packing and spatial arrangement of amino acid residues in globular proteins	Biochim. Biophys. Acta 623, 301-316 (1980)
351	PONP800102	Average gain in surrounding hydrophobicity (Ponnuswamy et al., 1980)	Ponnuswamy, P.K., Prabhakaran, M. and Manavalan, P.	Hydrophobic packing and spatial arrangement of amino acid residues in globular proteins	Biochim. Biophys. Acta 623, 301-316 (1980)
352	PONP800103	Average gain ratio in surrounding hydrophobicity (Ponnuswamy et al., 1980)	Ponnuswamy, P.K., Prabhakaran, M. and Manavalan, P.	Hydrophobic packing and spatial arrangement of amino acid residues in globular proteins	Biochim. Biophys. Acta 623, 301-316 (1980)
353	PONP800104	Surrounding hydrophobicity in alpha-helix (Ponnuswamy et al., 1980)	Ponnuswamy, P.K., Prabhakaran, M. and Manavalan, P.	Hydrophobic packing and spatial arrangement of amino acid residues in globular proteins	Biochim. Biophys. Acta 623, 301-316 (1980)
354	PONP800105	Surrounding hydrophobicity in beta-sheet (Ponnuswamy et al., 1980)	Ponnuswamy, P.K., Prabhakaran, M. and Manavalan, P.	Hydrophobic packing and spatial arrangement of amino acid residues in globular proteins	Biochim. Biophys. Acta 623, 301-316 (1980)
355	PONP800106	Surrounding hydrophobicity in turn (Ponnuswamy et al., 1980)	Ponnuswamy, P.K., Prabhakaran, M. and Manavalan, P.	Hydrophobic packing and spatial arrangement of amino acid residues in globular proteins	Biochim. Biophys. Acta 623, 301-316 (1980)
356	PONP800107	Accessibility reduction ratio (Ponnuswamy et al., 1980)	Ponnuswamy, P.K., Prabhakaran, M. and Manavalan, P.	Hydrophobic packing and spatial arrangement of amino acid residues in globular proteins	Biochim. Biophys. Acta 623, 301-316 (1980)
357	PONP800108	Average number of surrounding residues (Ponnuswamy et al., 1980)	Ponnuswamy, P.K., Prabhakaran, M. and Manavalan, P.	Hydrophobic packing and spatial arrangement of amino acid residues in globular proteins	Biochim. Biophys. Acta 623, 301-316 (1980)
358	PONP930101	Hydrophobicity scales (Ponnuswamy, 1993)	Ponnuswamy, P.K.	Hydrophobic characteristics of folded proteins	Prog Biophys Mol Biol. 59, 57-103 (1993)
359	PRAM820101	Intercept in regression analysis (Prabhakaran-Ponnuswamy, 1982)	Prabhakaran, M. and Ponnuswamy, P.K.	Shape and surface features of globular proteins	Macromolecules 15, 314-320 (1982)
360	PRAM820102	Slope in regression analysis x 1.0E1 (Prabhakaran-Ponnuswamy, 1982)	Prabhakaran, M. and Ponnuswamy, P.K.	Shape and surface features of globular proteins	Macromolecules 15, 314-320 (1982)
361	PRAM820103	Correlation coefficient in regression analysis (Prabhakaran-Ponnuswamy, 1982)	Prabhakaran, M. and Ponnuswamy, P.K.	Shape and surface features of globular proteins	Macromolecules 15, 314-320 (1982)
362	PRAM900101	Hydrophobicity (Prabhakaran, 1990)	Prabhakaran, M.	The distribution of physical, chemical and conformational properties in signal and nascent peptides	Biochem. J. 269, 691-696 (1990) Original references: Engelman, D.M., Steitz, T.A. and Terwilliger, T.C. Annu. Rev. Biophys. Chem. 15, 321-353 (1986)
363	PRAM900102	Relative frequency in alpha-helix (Prabhakaran, 1990)	Prabhakaran, M.	The distribution of physical, chemical and conformational properties in signal and nascent peptides	Biochem. J. 269, 691-696 (1990) Original reference of these three data: Creighton, T.E. In "Protein Structure and Melecular Properties", (Freeman, W.H., ed.), San Francisco P.235 (1983)
364	PRAM900103	Relative frequency in beta-sheet (Prabhakaran, 1990)	Prabhakaran, M.	The distribution of physical, chemical and conformational properties in signal and nascent peptides	Biochem. J. 269, 691-696 (1990) Original reference of these three data: Creighton, T.E. In "Protein Structure and Melecular Properties", (Freeman, W.H., ed.), San Francisco P.235 (1983)
365	PRAM900104	Relative frequency in reverse-turn (Prabhakaran, 1990)	Prabhakaran, M.	The distribution of physical, chemical and conformational properties in signal and nascent peptides	Biochem. J. 269, 691-696 (1990) Original reference of these three data: Creighton, T.E. In "Protein Structure and Melecular Properties", (Freeman, W.H., ed.), San Francisco P.235 (1983)
366	PTIO830101	Helix-coil equilibrium constant (Ptitsyn-Finkelstein, 1983)	Ptitsyn, O.B. and Finkelstein, A.V.	Theory of protein secondary structure and algorithm of its prediction	Biopolymers 22, 15-25 (1983)
367	PTIO830102	Beta-coil equilibrium constant (Ptitsyn-Finkelstein, 1983)	Ptitsyn, O.B. and Finkelstein, A.V.	Theory of protein secondary structure and algorithm of its prediction	Biopolymers 22, 15-25 (1983)
368	PUNT030101	Knowledge-based membrane-propensity scale from 1D_Helix in MPtopo databases (Punta-Maritan, 2003)	Punta, M. and Maritan, A.	A knowledge-based scale for amino acid membrane propensity	Proteins 50, 114-121 (2003)
369	PUNT030102	Knowledge-based membrane-propensity scale from 3D_Helix in MPtopo databases (Punta-Maritan, 2003)	Punta, M. and Maritan, A.	A knowledge-based scale for amino acid membrane propensity	Proteins 50, 114-121 (2003)
370	QIAN880101	Weights for alpha-helix at the window position of -6 (Qian-Sejnowski, 1988)	Qian, N. and Sejnowski, T.J.	Predicting the secondary structure of globular proteins using neural network models	J. Mol. Biol. 202, 865-884 (1988)
371	QIAN880102	Weights for alpha-helix at the window position of -5 (Qian-Sejnowski, 1988)	Qian, N. and Sejnowski, T.J.	Predicting the secondary structure of globular proteins using neural network models	J. Mol. Biol. 202, 865-884 (1988)
372	QIAN880103	Weights for alpha-helix at the window position of -4 (Qian-Sejnowski, 1988)	Qian, N. and Sejnowski, T.J.	Predicting the secondary structure of globular proteins using neural network models	J. Mol. Biol. 202, 865-884 (1988)
373	QIAN880104	Weights for alpha-helix at the window position of -3 (Qian-Sejnowski, 1988)	Qian, N. and Sejnowski, T.J.	Predicting the secondary structure of globular proteins using neural network models	J. Mol. Biol. 202, 865-884 (1988)
374	QIAN880105	Weights for alpha-helix at the window position of -2 (Qian-Sejnowski, 1988)	Qian, N. and Sejnowski, T.J.	Predicting the secondary structure of globular proteins using neural network models	J. Mol. Biol. 202, 865-884 (1988)
375	QIAN880106	Weights for alpha-helix at the window position of -1 (Qian-Sejnowski, 1988)	Qian, N. and Sejnowski, T.J.	Predicting the secondary structure of globular proteins using neural network models	J. Mol. Biol. 202, 865-884 (1988)
376	QIAN880107	Weights for alpha-helix at the window position of 0 (Qian-Sejnowski, 1988)	Qian, N. and Sejnowski, T.J.	Predicting the secondary structure of globular proteins using neural network models	J. Mol. Biol. 202, 865-884 (1988)
377	QIAN880108	Weights for alpha-helix at the window position of 1 (Qian-Sejnowski, 1988)	Qian, N. and Sejnowski, T.J.	Predicting the secondary structure of globular proteins using neural network models	J. Mol. Biol. 202, 865-884 (1988)
378	QIAN880109	Weights for alpha-helix at the window position of 2 (Qian-Sejnowski, 1988)	Qian, N. and Sejnowski, T.J.	Predicting the secondary structure of globular proteins using neural network models	J. Mol. Biol. 202, 865-884 (1988)
379	QIAN880110	Weights for alpha-helix at the window position of 3 (Qian-Sejnowski, 1988)	Qian, N. and Sejnowski, T.J.	Predicting the secondary structure of globular proteins using neural network models	J. Mol. Biol. 202, 865-884 (1988)
380	QIAN880111	Weights for alpha-helix at the window position of 4 (Qian-Sejnowski, 1988)	Qian, N. and Sejnowski, T.J.	Predicting the secondary structure of globular proteins using neural network models	J. Mol. Biol. 202, 865-884 (1988)
381	QIAN880112	Weights for alpha-helix at the window position of 5 (Qian-Sejnowski, 1988)	Qian, N. and Sejnowski, T.J.	Predicting the secondary structure of globular proteins using neural network models	J. Mol. Biol. 202, 865-884 (1988)
382	QIAN880113	Weights for alpha-helix at the window position of 6 (Qian-Sejnowski, 1988)	Qian, N. and Sejnowski, T.J.	Predicting the secondary structure of globular proteins using neural network models	J. Mol. Biol. 202, 865-884 (1988)
383	QIAN880114	Weights for beta-sheet at the window position of -6 (Qian-Sejnowski, 1988)	Qian, N. and Sejnowski, T.J.	Predicting the secondary structure of globular proteins using neural network models	J. Mol. Biol. 202, 865-884 (1988)
384	QIAN880115	Weights for beta-sheet at the window position of -5 (Qian-Sejnowski, 1988)	Qian, N. and Sejnowski, T.J.	Predicting the secondary structure of globular proteins using neural network models	J. Mol. Biol. 202, 865-884 (1988)
385	QIAN880116	Weights for beta-sheet at the window position of -4 (Qian-Sejnowski, 1988)	Qian, N. and Sejnowski, T.J.	Predicting the secondary structure of globular proteins using neural network models	J. Mol. Biol. 202, 865-884 (1988)
386	QIAN880117	Weights for beta-sheet at the window position of -3 (Qian-Sejnowski, 1988)	Qian, N. and Sejnowski, T.J.	Predicting the secondary structure of globular proteins using neural network models	J. Mol. Biol. 202, 865-884 (1988)
387	QIAN880118	Weights for beta-sheet at the window position of -2 (Qian-Sejnowski, 1988)	Qian, N. and Sejnowski, T.J.	Predicting the secondary structure of globular proteins using neural network models	J. Mol. Biol. 202, 865-884 (1988)
388	QIAN880119	Weights for beta-sheet at the window position of -1 (Qian-Sejnowski, 1988)	Qian, N. and Sejnowski, T.J.	Predicting the secondary structure of globular proteins using neural network models	J. Mol. Biol. 202, 865-884 (1988)
389	QIAN880120	Weights for beta-sheet at the window position of 0 (Qian-Sejnowski, 1988)	Qian, N. and Sejnowski, T.J.	Predicting the secondary structure of globular proteins using neural network models	J. Mol. Biol. 202, 865-884 (1988)
390	QIAN880121	Weights for beta-sheet at the window position of 1 (Qian-Sejnowski, 1988)	Qian, N. and Sejnowski, T.J.	Predicting the secondary structure of globular proteins using neural network models	J. Mol. Biol. 202, 865-884 (1988)
391	QIAN880122	Weights for beta-sheet at the window position of 2 (Qian-Sejnowski, 1988)	Qian, N. and Sejnowski, T.J.	Predicting the secondary structure of globular proteins using neural network models	J. Mol. Biol. 202, 865-884 (1988)
392	QIAN880123	Weights for beta-sheet at the window position of 3 (Qian-Sejnowski, 1988)	Qian, N. and Sejnowski, T.J.	Predicting the secondary structure of globular proteins using neural network models	J. Mol. Biol. 202, 865-884 (1988)
393	QIAN880124	Weights for beta-sheet at the window position of 4 (Qian-Sejnowski, 1988)	Qian, N. and Sejnowski, T.J.	Predicting the secondary structure of globular proteins using neural network models	J. Mol. Biol. 202, 865-884 (1988)
394	QIAN880125	Weights for beta-sheet at the window position of 5 (Qian-Sejnowski, 1988)	Qian, N. and Sejnowski, T.J.	Predicting the secondary structure of globular proteins using neural network models	J. Mol. Biol. 202, 865-884 (1988)
395	QIAN880126	Weights for beta-sheet at the window position of 6 (Qian-Sejnowski, 1988)	Qian, N. and Sejnowski, T.J.	Predicting the secondary structure of globular proteins using neural network models	J. Mol. Biol. 202, 865-884 (1988)
396	QIAN880127	Weights for coil at the window position of -6 (Qian-Sejnowski, 1988)	Qian, N. and Sejnowski, T.J.	Predicting the secondary structure of globular proteins using neural network models	J. Mol. Biol. 202, 865-884 (1988)
397	QIAN880128	Weights for coil at the window position of -5 (Qian-Sejnowski, 1988)	Qian, N. and Sejnowski, T.J.	Predicting the secondary structure of globular proteins using neural network models	J. Mol. Biol. 202, 865-884 (1988)
398	QIAN880129	Weights for coil at the window position of -4 (Qian-Sejnowski, 1988)	Qian, N. and Sejnowski, T.J.	Predicting the secondary structure of globular proteins using neural network models	J. Mol. Biol. 202, 865-884 (1988)
399	QIAN880130	Weights for coil at the window position of -3 (Qian-Sejnowski, 1988)	Qian, N. and Sejnowski, T.J.	Predicting the secondary structure of globular proteins using neural network models	J. Mol. Biol. 202, 865-884 (1988)
400	QIAN880131	Weights for coil at the window position of -2 (Qian-Sejnowski, 1988)	Qian, N. and Sejnowski, T.J.	Predicting the secondary structure of globular proteins using neural network models	J. Mol. Biol. 202, 865-884 (1988)
401	QIAN880132	Weights for coil at the window position of -1 (Qian-Sejnowski, 1988)	Qian, N. and Sejnowski, T.J.	Predicting the secondary structure of globular proteins using neural network models	J. Mol. Biol. 202, 865-884 (1988)
402	QIAN880133	Weights for coil at the window position of 0 (Qian-Sejnowski, 1988)	Qian, N. and Sejnowski, T.J.	Predicting the secondary structure of globular proteins using neural network models	J. Mol. Biol. 202, 865-884 (1988)
403	QIAN880134	Weights for coil at the window position of 1 (Qian-Sejnowski, 1988)	Qian, N. and Sejnowski, T.J.	Predicting the secondary structure of globular proteins using neural network models	J. Mol. Biol. 202, 865-884 (1988)
404	QIAN880135	Weights for coil at the window position of 2 (Qian-Sejnowski, 1988)	Qian, N. and Sejnowski, T.J.	Predicting the secondary structure of globular proteins using neural network models	J. Mol. Biol. 202, 865-884 (1988)
405	QIAN880136	Weights for coil at the window position of 3 (Qian-Sejnowski, 1988)	Qian, N. and Sejnowski, T.J.	Predicting the secondary structure of globular proteins using neural network models	J. Mol. Biol. 202, 865-884 (1988)
406	QIAN880137	Weights for coil at the window position of 4 (Qian-Sejnowski, 1988)	Qian, N. and Sejnowski, T.J.	Predicting the secondary structure of globular proteins using neural network models	J. Mol. Biol. 202, 865-884 (1988)
407	QIAN880138	Weights for coil at the window position of 5 (Qian-Sejnowski, 1988)	Qian, N. and Sejnowski, T.J.	Predicting the secondary structure of globular proteins using neural network models	J. Mol. Biol. 202, 865-884 (1988)
408	QIAN880139	Weights for coil at the window position of 6 (Qian-Sejnowski, 1988)	Qian, N. and Sejnowski, T.J.	Predicting the secondary structure of globular proteins using neural network models	J. Mol. Biol. 202, 865-884 (1988)
409	RACS770101	Average reduced distance for C-alpha (Rackovsky-Scheraga, 1977)	Rackovsky, S. and Scheraga, H.A.	Hydrophobicity, hydrophilicity, and the radial and orientational distributions of residues in native proteins	Proc. Natl. Acad. Sci. USA 74, 5248-5251 (1977)
410	RACS770102	Average reduced distance for side chain (Rackovsky-Scheraga, 1977)	Rackovsky, S. and Scheraga, H.A.	Hydrophobicity, hydrophilicity, and the radial and orientational distributions of residues in native proteins	Proc. Natl. Acad. Sci. USA 74, 5248-5251 (1977)
411	RACS770103	Side chain orientational preference (Rackovsky-Scheraga, 1977)	Rackovsky, S. and Scheraga, H.A.	Hydrophobicity, hydrophilicity, and the radial and orientational distributions of residues in native proteins	Proc. Natl. Acad. Sci. USA 74, 5248-5251 (1977)
412	RACS820101	Average relative fractional occurrence in A0(i) (Rackovsky-Scheraga, 1982)	Rackovsky, S. and Scheraga, H.A.	Differential geometry and polymer conformation. 4. Conformational and nucleation properties of individual amino acids	Macromolecules 15, 1340-1346 (1982)
413	RACS820102	Average relative fractional occurrence in AR(i) (Rackovsky-Scheraga, 1982)	Rackovsky, S. and Scheraga, H.A.	Differential geometry and polymer conformation. 4. Conformational and nucleation properties of individual amino acids	Macromolecules 15, 1340-1346 (1982)
414	RACS820103	Average relative fractional occurrence in AL(i) (Rackovsky-Scheraga, 1982)	Rackovsky, S. and Scheraga, H.A.	Differential geometry and polymer conformation. 4. Conformational and nucleation properties of individual amino acids	Macromolecules 15, 1340-1346 (1982)
415	RACS820104	Average relative fractional occurrence in EL(i) (Rackovsky-Scheraga, 1982)	Rackovsky, S. and Scheraga, H.A.	Differential geometry and polymer conformation. 4. Conformational and nucleation properties of individual amino acids	Macromolecules 15, 1340-1346 (1982)
416	RACS820105	Average relative fractional occurrence in E0(i) (Rackovsky-Scheraga, 1982)	Rackovsky, S. and Scheraga, H.A.	Differential geometry and polymer conformation. 4. Conformational and nucleation properties of individual amino acids	Macromolecules 15, 1340-1346 (1982)
417	RACS820106	Average relative fractional occurrence in ER(i) (Rackovsky-Scheraga, 1982)	Rackovsky, S. and Scheraga, H.A.	Differential geometry and polymer conformation. 4. Conformational and nucleation properties of individual amino acids	Macromolecules 15, 1340-1346 (1982)
418	RACS820107	Average relative fractional occurrence in A0(i-1) (Rackovsky-Scheraga, 1982)	Rackovsky, S. and Scheraga, H.A.	Differential geometry and polymer conformation. 4. Conformational and nucleation properties of individual amino acids	Macromolecules 15, 1340-1346 (1982)
419	RACS820108	Average relative fractional occurrence in AR(i-1) (Rackovsky-Scheraga, 1982)	Rackovsky, S. and Scheraga, H.A.	Differential geometry and polymer conformation. 4. Conformational and nucleation properties of individual amino acids	Macromolecules 15, 1340-1346 (1982)
420	RACS820109	Average relative fractional occurrence in AL(i-1) (Rackovsky-Scheraga, 1982)	Rackovsky, S. and Scheraga, H.A.	Differential geometry and polymer conformation. 4. Conformational and nucleation properties of individual amino acids	Macromolecules 15, 1340-1346 (1982)
421	RACS820110	Average relative fractional occurrence in EL(i-1) (Rackovsky-Scheraga, 1982)	Rackovsky, S. and Scheraga, H.A.	Differential geometry and polymer conformation. 4. Conformational and nucleation properties of individual amino acids	Macromolecules 15, 1340-1346 (1982)
422	RACS820111	Average relative fractional occurrence in E0(i-1) (Rackovsky-Scheraga, 1982)	Rackovsky, S. and Scheraga, H.A.	Differential geometry and polymer conformation. 4. Conformational and nucleation properties of individual amino acids	Macromolecules 15, 1340-1346 (1982)
423	RACS820112	Average relative fractional occurrence in ER(i-1) (Rackovsky-Scheraga, 1982)	Rackovsky, S. and Scheraga, H.A.	Differential geometry and polymer conformation. 4. Conformational and nucleation properties of individual amino acids	Macromolecules 15, 1340-1346 (1982)
424	RACS820113	Value of theta(i) (Rackovsky-Scheraga, 1982)	Rackovsky, S. and Scheraga, H.A.	Differential geometry and polymer conformation. 4. Conformational and nucleation properties of individual amino acids	Macromolecules 15, 1340-1346 (1982)
425	RACS820114	Value of theta(i-1) (Rackovsky-Scheraga, 1982)	Rackovsky, S. and Scheraga, H.A.	Differential geometry and polymer conformation. 4. Conformational and nucleation properties of individual amino acids	Macromolecules 15, 1340-1346 (1982)
426	RADA880101	Transfer free energy from chx to wat (Radzicka-Wolfenden, 1988)	Radzicka, A. and Wolfenden, R.	Comparing the polarities of the amino acids: Side-chain distribution coefficients between the vapor phase, cyclohexane, 1-octanol, and neutral aqueous solution	Biochemistry 27, 1664-1670 (1988)
427	RADA880102	Transfer free energy from oct to wat (Radzicka-Wolfenden, 1988)	Radzicka, A. and Wolfenden, R.	Comparing the polarities of the amino acids: Side-chain distribution coefficients between the vapor phase, cyclohexane, 1-octanol, and neutral aqueous solution	Biochemistry 27, 1664-1670 (1988)
428	RADA880103	Transfer free energy from vap to chx (Radzicka-Wolfenden, 1988)	Radzicka, A. and Wolfenden, R.	Comparing the polarities of the amino acids: Side-chain distribution coefficients between the vapor phase, cyclohexane, 1-octanol, and neutral aqueous solution	Biochemistry 27, 1664-1670 (1988)
429	RADA880104	Transfer free energy from chx to oct (Radzicka-Wolfenden, 1988)	Radzicka, A. and Wolfenden, R.	Comparing the polarities of the amino acids: Side-chain distribution coefficients between the vapor phase, cyclohexane, 1-octanol, and neutral aqueous solution	Biochemistry 27, 1664-1670 (1988)
430	RADA880105	Transfer free energy from vap to oct (Radzicka-Wolfenden, 1988)	Radzicka, A. and Wolfenden, R.	Comparing the polarities of the amino acids: Side-chain distribution coefficients between the vapor phase, cyclohexane, 1-octanol, and neutral aqueous solution	Biochemistry 27, 1664-1670 (1988)
431	RADA880106	Accessible surface area (Radzicka-Wolfenden, 1988)	Radzicka, A. and Wolfenden, R.	Comparing the polarities of the amino acids: Side-chain distribution coefficients between the vapor phase, cyclohexane, 1-octanol, and neutral aqueous solution	Biochemistry 27, 1664-1670 (1988)
432	RADA880107	Energy transfer from out to in(95%buried) (Radzicka-Wolfenden, 1988)	Radzicka, A. and Wolfenden, R.	Comparing the polarities of the amino acids: Side-chain distribution coefficients between the vapor phase, cyclohexane, 1-octanol, and neutral aqueous solution	Biochemistry 27, 1664-1670 (1988)
433	RADA880108	Mean polarity (Radzicka-Wolfenden, 1988)	Radzicka, A. and Wolfenden, R.	Comparing the polarities of the amino acids: Side-chain distribution coefficients between the vapor phase, cyclohexane, 1-octanol, and neutral aqueous solution	Biochemistry 27, 1664-1670 (1988)
434	RICJ880101	Relative preference value at N" (Richardson-Richardson, 1988)	Richardson, J.S. and Richardson, D.C.	Amino acid preferences for specific locations at the ends of alpha helices	Science 240, 1648-1652 (1988)
435	RICJ880102	Relative preference value at N' (Richardson-Richardson, 1988)	Richardson, J.S. and Richardson, D.C.	Amino acid preferences for specific locations at the ends of alpha helices	Science 240, 1648-1652 (1988)
436	RICJ880103	Relative preference value at N-cap (Richardson-Richardson, 1988)	Richardson, J.S. and Richardson, D.C.	Amino acid preferences for specific locations at the ends of alpha helices	Science 240, 1648-1652 (1988)
437	RICJ880104	Relative preference value at N1 (Richardson-Richardson, 1988)	Richardson, J.S. and Richardson, D.C.	Amino acid preferences for specific locations at the ends of alpha helices	Science 240, 1648-1652 (1988)
438	RICJ880105	Relative preference value at N2 (Richardson-Richardson, 1988)	Richardson, J.S. and Richardson, D.C.	Amino acid preferences for specific locations at the ends of alpha helices	Science 240, 1648-1652 (1988)
439	RICJ880106	Relative preference value at N3 (Richardson-Richardson, 1988)	Richardson, J.S. and Richardson, D.C.	Amino acid preferences for specific locations at the ends of alpha helices	Science 240, 1648-1652 (1988)
440	RICJ880107	Relative preference value at N4 (Richardson-Richardson, 1988)	Richardson, J.S. and Richardson, D.C.	Amino acid preferences for specific locations at the ends of alpha helices	Science 240, 1648-1652 (1988)
441	RICJ880108	Relative preference value at N5 (Richardson-Richardson, 1988)	Richardson, J.S. and Richardson, D.C.	Amino acid preferences for specific locations at the ends of alpha helices	Science 240, 1648-1652 (1988)
442	RICJ880109	Relative preference value at Mid (Richardson-Richardson, 1988)	Richardson, J.S. and Richardson, D.C.	Amino acid preferences for specific locations at the ends of alpha helices	Science 240, 1648-1652 (1988)
443	RICJ880110	Relative preference value at C5 (Richardson-Richardson, 1988)	Richardson, J.S. and Richardson, D.C.	Amino acid preferences for specific locations at the ends of alpha helices	Science 240, 1648-1652 (1988)
444	RICJ880111	Relative preference value at C4 (Richardson-Richardson, 1988)	Richardson, J.S. and Richardson, D.C.	Amino acid preferences for specific locations at the ends of alpha helices	Science 240, 1648-1652 (1988)
445	RICJ880112	Relative preference value at C3 (Richardson-Richardson, 1988)	Richardson, J.S. and Richardson, D.C.	Amino acid preferences for specific locations at the ends of alpha helices	Science 240, 1648-1652 (1988)
446	RICJ880113	Relative preference value at C2 (Richardson-Richardson, 1988)	Richardson, J.S. and Richardson, D.C.	Amino acid preferences for specific locations at the ends of alpha helices	Science 240, 1648-1652 (1988)
447	RICJ880114	Relative preference value at C1 (Richardson-Richardson, 1988)	Richardson, J.S. and Richardson, D.C.	Amino acid preferences for specific locations at the ends of alpha helices	Science 240, 1648-1652 (1988)
448	RICJ880115	Relative preference value at C-cap (Richardson-Richardson, 1988)	Richardson, J.S. and Richardson, D.C.	Amino acid preferences for specific locations at the ends of alpha helices	Science 240, 1648-1652 (1988)
449	RICJ880116	Relative preference value at C' (Richardson-Richardson, 1988)	Richardson, J.S. and Richardson, D.C.	Amino acid preferences for specific locations at the ends of alpha helices	Science 240, 1648-1652 (1988)
450	RICJ880117	Relative preference value at C" (Richardson-Richardson, 1988)	Richardson, J.S. and Richardson, D.C.	Amino acid preferences for specific locations at the ends of alpha helices	Science 240, 1648-1652 (1988)
451	ROBB760101	Information measure for alpha-helix (Robson-Suzuki, 1976)	Robson, B. and Suzuki, E.	Conformational properties of amino acid residues in globular proteins	J. Mol. Biol. 107, 327-356 (1976)
452	ROBB760102	Information measure for N-terminal helix (Robson-Suzuki, 1976)	Robson, B. and Suzuki, E.	Conformational properties of amino acid residues in globular proteins	J. Mol. Biol. 107, 327-356 (1976)
453	ROBB760103	Information measure for middle helix (Robson-Suzuki, 1976)	Robson, B. and Suzuki, E.	Conformational properties of amino acid residues in globular proteins	J. Mol. Biol. 107, 327-356 (1976)
454	ROBB760104	Information measure for C-terminal helix (Robson-Suzuki, 1976)	Robson, B. and Suzuki, E.	Conformational properties of amino acid residues in globular proteins	J. Mol. Biol. 107, 327-356 (1976)
455	ROBB760105	Information measure for extended (Robson-Suzuki, 1976)	Robson, B. and Suzuki, E.	Conformational properties of amino acid residues in globular proteins	J. Mol. Biol. 107, 327-356 (1976)
456	ROBB760106	Information measure for pleated-sheet (Robson-Suzuki, 1976)	Robson, B. and Suzuki, E.	Conformational properties of amino acid residues in globular proteins	J. Mol. Biol. 107, 327-356 (1976)
457	ROBB760107	Information measure for extended without H-bond (Robson-Suzuki, 1976)	Robson, B. and Suzuki, E.	Conformational properties of amino acid residues in globular proteins	J. Mol. Biol. 107, 327-356 (1976)
458	ROBB760108	Information measure for turn (Robson-Suzuki, 1976)	Robson, B. and Suzuki, E.	Conformational properties of amino acid residues in globular proteins	J. Mol. Biol. 107, 327-356 (1976)
459	ROBB760109	Information measure for N-terminal turn (Robson-Suzuki, 1976)	Robson, B. and Suzuki, E.	Conformational properties of amino acid residues in globular proteins	J. Mol. Biol. 107, 327-356 (1976)
460	ROBB760110	Information measure for middle turn (Robson-Suzuki, 1976)	Robson, B. and Suzuki, E.	Conformational properties of amino acid residues in globular proteins	J. Mol. Biol. 107, 327-356 (1976)
461	ROBB760111	Information measure for C-terminal turn (Robson-Suzuki, 1976)	Robson, B. and Suzuki, E.	Conformational properties of amino acid residues in globular proteins	J. Mol. Biol. 107, 327-356 (1976)
462	ROBB760112	Information measure for coil (Robson-Suzuki, 1976)	Robson, B. and Suzuki, E.	Conformational properties of amino acid residues in globular proteins	J. Mol. Biol. 107, 327-356 (1976)
463	ROBB760113	Information measure for loop (Robson-Suzuki, 1976)	Robson, B. and Suzuki, E.	Conformational properties of amino acid residues in globular proteins	J. Mol. Biol. 107, 327-356 (1976)
464	ROBB790101	Hydration free energy (Robson-Osguthorpe, 1979)	Robson, B. and Osguthorpe, D.J.	Refined models for computer simulation of protein folding: Applications to the study of conserved secondary structure and flexible hinge points during the folding of pancreatic trypsin inhibitor	J. Mol. Biol. 132, 19-51 (1979)
465	ROSG850101	Mean area buried on transfer (Rose et al., 1985)	Rose, G.D., Geselowitz, A.R., Lesser, G.J., Lee, R.H. and Zehfus, M.H.	Hydrophobicity of amino acid residues in globular proteins	Science 229, 834-838 (1985)
466	ROSG850102	Mean fractional area loss (Rose et al., 1985)	Rose, G.D., Geselowitz, A.R., Lesser, G.J., Lee, R.H. and Zehfus, M.H.	Hydrophobicity of amino acid residues in globular proteins	Science 229, 834-838 (1985)
467	ROSM880101	Side chain hydropathy, uncorrected for solvation (Roseman, 1988)	Roseman, M.A.	Hydrophilicity of polar amino acid side-chains is markedly reduced by flanking peptide bonds	J. Mol. Biol. 200, 513-522 (1988)
468	ROSM880102	Side chain hydropathy, corrected for solvation (Roseman, 1988)	Roseman, M.A.	Hydrophilicity of polar amino acid side-chains is markedly reduced by flanking peptide bonds	J. Mol. Biol. 200, 513-522 (1988)
469	ROSM880103	Loss of Side chain hydropathy by helix formation (Roseman, 1988)	Roseman, M.A.	Hydrophilicity of polar amino acid side-chains is markedly reduced by flanking peptide bonds	J. Mol. Biol. 200, 513-522 (1988)
470	SIMZ760101	Transfer free energy (Simon, 1976), Cited by Charton-Charton (1982)	Simon, Z.		Quantum Biochemistry and Specific Interactions, Abacus Press, Tunbridge Wells, Kent, England (1976) Cited by Charton-Charton (1982)
471	SNEP660101	Principal component I (Sneath, 1966)	Sneath, P.H.A.	Relations between chemical structure and biological activity in peptides	J. Theor. Biol. 12, 157-195 (1966)
472	SNEP660102	Principal component II (Sneath, 1966)	Sneath, P.H.A.	Relations between chemical structure and biological activity in peptides	J. Theor. Biol. 12, 157-195 (1966)
473	SNEP660103	Principal component III (Sneath, 1966)	Sneath, P.H.A.	Relations between chemical structure and biological activity in peptides	J. Theor. Biol. 12, 157-195 (1966)
474	SNEP660104	Principal component IV (Sneath, 1966)	Sneath, P.H.A.	Relations between chemical structure and biological activity in peptides	J. Theor. Biol. 12, 157-195 (1966)
475	SUEM840101	Zimm-Bragg parameter s at 20 C (Sueki et al., 1984)	Sueki, M., Lee, S., Powers, S.P., Denton, J.B., Konishi, Y. and Scheraga, H.A.	Helix-coil stability constants for the naturally occurring amino acids in water. 22. Histidine parameters from random poly{(hydroxybutyl)glutamine-co-L-histidine}	Macromolecules 17, 148-155 (1984)
476	SUEM840102	Zimm-Bragg parameter sigma x 1.0E4 (Sueki et al., 1984)	Sueki, M., Lee, S., Powers, S.P., Denton, J.B., Konishi, Y. and Scheraga, H.A.	Helix-coil stability constants for the naturally occurring amino acids in water. 22. Histidine parameters from random poly{(hydroxybutyl)glutamine-co-L-histidine}	Macromolecules 17, 148-155 (1984)
477	SUYM030101	Linker propensity index (Suyama-Ohara, 2003)	Suyama, M. and Ohara, O.	DomCut: Prediction of inter-domain linker regions in amino acid sequences	Bioinformatics 19, 673-674 (2003)
478	SWER830101	Optimal matching hydrophobicity (Sweet-Eisenberg, 1983)	Sweet, R.M. and Eisenberg, D.	Correlation of sequence hydrophobicities measures similarity in three-dimensional protein structure	J. Mol. Biol. 171, 479-488 (1983)
479	TAKK010101	Side-chain contribution to protein stability (kJ/mol) (Takano-Yutani, 2001)	Takano, K., Yutani, K.	A new scale for side-chain contribution to protein stability based on the empirical stability analysis of mutant proteins	Protein Eng. 14, 525-528 (2001)
480	TANS770101	Normalized frequency of alpha-helix (Tanaka-Scheraga, 1977)	Tanaka, S. and Scheraga, H.A.	Statistical mechanical treatment of protein conformation. 5. A multiphasic model for specific-sequence copolymers of amino acids	Macromolecules 10, 9-20 (1977)
481	TANS770102	Normalized frequency of isolated helix (Tanaka-Scheraga, 1977)	Tanaka, S. and Scheraga, H.A.	Statistical mechanical treatment of protein conformation. 5. A multiphasic model for specific-sequence copolymers of amino acids	Macromolecules 10, 9-20 (1977)
482	TANS770103	Normalized frequency of extended structure (Tanaka-Scheraga, 1977)	Tanaka, S. and Scheraga, H.A.	Statistical mechanical treatment of protein conformation. 5. A multiphasic model for specific-sequence copolymers of amino acids	Macromolecules 10, 9-20 (1977)
483	TANS770104	Normalized frequency of chain reversal R (Tanaka-Scheraga, 1977)	Tanaka, S. and Scheraga, H.A.	Statistical mechanical treatment of protein conformation. 5. A multiphasic model for specific-sequence copolymers of amino acids	Macromolecules 10, 9-20 (1977)
484	TANS770105	Normalized frequency of chain reversal S (Tanaka-Scheraga, 1977)	Tanaka, S. and Scheraga, H.A.	Statistical mechanical treatment of protein conformation. 5. A multiphasic model for specific-sequence copolymers of amino acids	Macromolecules 10, 9-20 (1977)
485	TANS770106	Normalized frequency of chain reversal D (Tanaka-Scheraga, 1977)	Tanaka, S. and Scheraga, H.A.	Statistical mechanical treatment of protein conformation. 5. A multiphasic model for specific-sequence copolymers of amino acids	Macromolecules 10, 9-20 (1977)
486	TANS770107	Normalized frequency of left-handed helix (Tanaka-Scheraga, 1977)	Tanaka, S. and Scheraga, H.A.	Statistical mechanical treatment of protein conformation. 5. A multiphasic model for specific-sequence copolymers of amino acids	Macromolecules 10, 9-20 (1977)
487	TANS770108	Normalized frequency of zeta R (Tanaka-Scheraga, 1977)	Tanaka, S. and Scheraga, H.A.	Statistical mechanical treatment of protein conformation. 5. A multiphasic model for specific-sequence copolymers of amino acids	Macromolecules 10, 9-20 (1977)
488	TANS770109	Normalized frequency of coil (Tanaka-Scheraga, 1977)	Tanaka, S. and Scheraga, H.A.	Statistical mechanical treatment of protein conformation. 5. A multiphasic model for specific-sequence copolymers of amino acids	Macromolecules 10, 9-20 (1977)
489	TANS770110	Normalized frequency of chain reversal (Tanaka-Scheraga, 1977)	Tanaka, S. and Scheraga, H.A.	Statistical mechanical treatment of protein conformation. 5. A multiphasic model for specific-sequence copolymers of amino acids	Macromolecules 10, 9-20 (1977)
490	TSAJ990101	Volumes including the crystallographic waters using the ProtOr (Tsai et al., 1999)	Tsai, J., Taylor, R., Chothia, C. and Gerstein, M.	The packing density in proteins: standard radii and volumes	J. Mol. Biol. 290, 253-266 (1999)
491	TSAJ990102	Volumes not including the crystallographic waters using the ProtOr (Tsai et al., 1999)	Tsai, J., Taylor, R., Chothia, C. and Gerstein, M.	The packing density in proteins: standard radii and volumes	J. Mol. Biol. 290, 253-266 (1999)
492	VASM830101	Relative population of conformational state A (Vasquez et al., 1983)	Vasquez, M., Nemethy, G. and Scheraga, H.A.	Computed conformational states of the 20 naturally occurring amino acid residues and of the prototype residue alpha-aminobutyric acid	Macromolecules 16, 1043-1049 (1983)
493	VASM830102	Relative population of conformational state C (Vasquez et al., 1983)	Vasquez, M., Nemethy, G. and Scheraga, H.A.	Computed conformational states of the 20 naturally occurring amino acid residues and of the prototype residue alpha-aminobutyric acid	Macromolecules 16, 1043-1049 (1983)
494	VASM830103	Relative population of conformational state E (Vasquez et al., 1983)	Vasquez, M., Nemethy, G. and Scheraga, H.A.	Computed conformational states of the 20 naturally occurring amino acid residues and of the prototype residue alpha-aminobutyric acid	Macromolecules 16, 1043-1049 (1983)
495	VELV850101	Electron-ion interaction potential (Veljkovic et al., 1985)	Veljkovic, V., Cosic, I., Dimitrijevic, B. and Lalovic, D.	Is it possible to analyze DNA and protein sequences by the method of digital signal processing?	IEEE Trans. Biomed. Eng. 32, 337-341 (1985)
496	VENT840101	Bitterness (Venanzi, 1984)	Venanzi, T.J.	Hydrophobicity parameters and the bitter taste of L-amino acids	J. Theor. Biol. 111, 447-450 (1984)
497	VHEG790101	Transfer free energy to lipophilic phase (von Heijne-Blomberg, 1979)	von Heijne, G. and Blomberg, C.	Trans-membrane translocation of proteins: The direct transfer model	Eur. J. Biochem. 97, 175-181 (1979)
498	VINM940101	Normalized flexibility parameters (B-values), average (Vihinen et al., 1994)	Vihinen, M., Torkkila, E. and Riikonen, P.	Accuracy of protein flexibility predictions	Proteins 19, 141-149 (1994)
499	VINM940102	Normalized flexibility parameters (B-values) for each residue surrounded by none rigid neighbours (Vihinen et al., 1994)	Vihinen, M., Torkkila, E. and Riikonen, P.	Accuracy of protein flexibility predictions	Proteins 19, 141-149 (1994)
500	VINM940103	Normalized flexibility parameters (B-values) for each residue surrounded by one rigid neighbours (Vihinen et al., 1994)	Vihinen, M., Torkkila, E. and Riikonen, P.	Accuracy of protein flexibility predictions	Proteins 19, 141-149 (1994)
501	VINM940104	Normalized flexibility parameters (B-values) for each residue surrounded by two rigid neighbours (Vihinen et al., 1994)	Vihinen, M., Torkkila, E. and Riikonen, P.	Accuracy of protein flexibility predictions	Proteins 19, 141-149 (1994)
502	WARP780101	Average interactions per side chain atom (Warme-Morgan, 1978)	Warme, P.K. and Morgan, R.S.	A survey of amino acid side-chain interactions in 21 proteins	J. Mol. Biol. 118, 289-304 (1978)
503	WEBA780101	RF value in high salt chromatography (Weber-Lacey, 1978)	Weber, A.L. and Lacey, J.C.,Jr.	Genetic code correlations: Amino acids and their anticodon nucleotides	J. Mol. Evol. 11, 199-210 (1978)
504	WERD780101	Propensity to be buried inside (Wertz-Scheraga, 1978)	Wertz, D.H. and Scheraga, H.A.	Influence of water on protein structure. An analysis of the preferences of amino acid residues for the inside or outside and for specific conformations in a protein molecule	Macromolecules 11, 9-15 (1978)
505	WERD780102	Free energy change of epsilon(i) to epsilon(ex) (Wertz-Scheraga, 1978)	Wertz, D.H. and Scheraga, H.A.	Influence of water on protein structure. An analysis of the preferences of amino acid residues for the inside or outside and for specific conformations in a protein molecule	Macromolecules 11, 9-15 (1978)
506	WERD780103	Free energy change of alpha(Ri) to alpha(Rh) (Wertz-Scheraga, 1978)	Wertz, D.H. and Scheraga, H.A.	Influence of water on protein structure. An analysis of the preferences of amino acid residues for the inside or outside and for specific conformations in a protein molecule	Macromolecules 11, 9-15 (1978)
507	WERD780104	Free energy change of epsilon(i) to alpha(Rh) (Wertz-Scheraga, 1978)	Wertz, D.H. and Scheraga, H.A.	Influence of water on protein structure. An analysis of the preferences of amino acid residues for the inside or outside and for specific conformations in a protein molecule	Macromolecules 11, 9-15 (1978)
508	WILM950101	Hydrophobicity coefficient in RP-HPLC, C18 with 0.1%TFA/MeCN/H2O (Wilce et al. 1995)	Wilce, M.C., Aguilar, M.I. and Hearn, M.T.	Physicochemical basis of amino acid hydrophobicity scales: evaluation of four new scales of amino acid hydrophobicity coefficients derived from RP-HPLC of peptides	Anal Chem. 67, 1210-1219 (1995)
509	WILM950102	Hydrophobicity coefficient in RP-HPLC, C8 with 0.1%TFA/MeCN/H2O (Wilce et al. 1995)	Wilce, M.C., Aguilar, M.I. and Hearn, M.T.	Physicochemical basis of amino acid hydrophobicity scales: evaluation of four new scales of amino acid hydrophobicity coefficients derived from RP-HPLC of peptides	Anal Chem. 67, 1210-1219 (1995)
510	WILM950103	Hydrophobicity coefficient in RP-HPLC, C4 with 0.1%TFA/MeCN/H2O (Wilce et al. 1995)	Wilce, M.C., Aguilar, M.I. and Hearn, M.T.	Physicochemical basis of amino acid hydrophobicity scales: evaluation of four new scales of amino acid hydrophobicity coefficients derived from RP-HPLC of peptides	Anal Chem. 67, 1210-1219 (1995)
511	WILM950104	Hydrophobicity coefficient in RP-HPLC, C18 with 0.1%TFA/2-PrOH/MeCN/H2O (Wilce et al. 1995)	Wilce, M.C., Aguilar, M.I. and Hearn, M.T.	Physicochemical basis of amino acid hydrophobicity scales: evaluation of four new scales of amino acid hydrophobicity coefficients derived from RP-HPLC of peptides	Anal Chem. 67, 1210-1219 (1995)
512	WIMW960101	Free energies of transfer of AcWl-X-LL peptides from bilayer interface to water (Wimley-White, 1996)	Wimley, W.C. and White, S.	Experimentally determined hydrophobicity scale for proteins at membrane interfaces	Nature Structual biol. 3, 842-848 (1996)
513	WOEC730101	Polar requirement (Woese, 1973)	Woese, C.R.	Evolution of genetic code	Naturwiss. 60, 447-459 (1973)
514	WOLR790101	Hydrophobicity index (Wolfenden et al., 1979)	Wolfenden, R.V., Cullis, P.M. and Southgate, C.C.F.	Water, protein folding, and the genetic code	Science 206, 575-577 (1979)
515	WOLR810101	Hydration potential (Wolfenden et al., 1981)	Wolfenden, R. andersson, L., Cullis, P.M. and Southgate, C.C.B.	Affinties of amino acid side chains for solvent water	Biochemistry 20, 849-855 (1981)
516	WOLS870101	Principal property value z1 (Wold et al., 1987)	Wold, S., Eriksson, L., Hellberg, S., Jonsson, J., Sjostrom, M., Skagerberg, B. and Wikstrom, C.	Principal property values for six non-natural amino acids and their application to a structure-activity relationship for oxytocin peptide analogues	Can. J. Chem. 65, 1814-1820 (1987)
517	WOLS870102	Principal property value z2 (Wold et al., 1987)	Wold, S., Eriksson, L., Hellberg, S., Jonsson, J., Sjostrom, M., Skagerberg, B. and Wikstrom, C.	Principal property values for six non-natural amino acids and their application to a structure-activity relationship for oxytocin peptide analogues	Can. J. Chem. 65, 1814-1820 (1987)
518	WOLS870103	Principal property value z3 (Wold et al., 1987)	Wold, S., Eriksson, L., Hellberg, S., Jonsson, J., Sjostrom, M., Skagerberg, B. and Wikstrom, C.	Principal property values for six non-natural amino acids and their application to a structure-activity relationship for oxytocin peptide analogues	Can. J. Chem. 65, 1814-1820 (1987)
519	YUTK870101	Unfolding Gibbs energy in water, pH7.0 (Yutani et al., 1987)	Yutani, K., Ogasahara, K., Tsujita, T. and Sugino, Y.	Dependence of conformational stability on hydrophobicity of the amino acid residue in a series of variant proteins substituted at a unique position of tryptophan synthase alpha subunit	Proc. Natl. Acad. Sci. USA 84, 4441-4444 (1987)
520	YUTK870102	Unfolding Gibbs energy in water, pH9.0 (Yutani et al., 1987)	Yutani, K., Ogasahara, K., Tsujita, T. and Sugino, Y.	Dependence of conformational stability on hydrophobicity of the amino acid residue in a series of variant proteins substituted at a unique position of tryptophan synthase alpha subunit	Proc. Natl. Acad. Sci. USA 84, 4441-4444 (1987)
521	YUTK870103	Activation Gibbs energy of unfolding, pH7.0 (Yutani et al., 1987)	Yutani, K., Ogasahara, K., Tsujita, T. and Sugino, Y.	Dependence of conformational stability on hydrophobicity of the amino acid residue in a series of variant proteins substituted at a unique position of tryptophan synthase alpha subunit	Proc. Natl. Acad. Sci. USA 84, 4441-4444 (1987)
522	YUTK870104	Activation Gibbs energy of unfolding, pH9.0 (Yutani et al., 1987)	Yutani, K., Ogasahara, K., Tsujita, T. and Sugino, Y.	Dependence of conformational stability on hydrophobicity of the amino acid residue in a series of variant proteins substituted at a unique position of tryptophan synthase alpha subunit	Proc. Natl. Acad. Sci. USA 84, 4441-4444 (1987)
523	ZASB820101	Dependence of partition coefficient on ionic strength (Zaslavsky et al., 1982)	Zaslavsky, B.Yu, Mestechkina, N.M., Miheeva, L.M. and Rogozhin, S.V.	Measurement of relative hydrophobicity of amino acid side-chains by partition in an aqueous two-phase polymeric system: Hydrophobicity scale for non-polar and ionogenic side-chains	J. Chromatogr. 240, 21-28 (1982)
524	ZHOH040101	The stability scale from the knowledge-based atom-atom potential (Zhou-Zhou, 2004)	Zhou, H. and Zhou, Y.	Quantifying the effect of burial of amino acid residues on protein stability	Proteins 54, 315-322 (2004)
525	ZHOH040102	The relative stability scale extracted from mutation experiments (Zhou-Zhou, 2004)	Zhou, H. and Zhou, Y.	Quantifying the effect of burial of amino acid residues on protein stability	Proteins 54, 315-322 (2004)
526	ZHOH040103	Buriability (Zhou-Zhou, 2004)	Zhou, H. and Zhou, Y.	Quantifying the effect of burial of amino acid residues on protein stability	Proteins 54, 315-322 (2004)
527	ZIMJ680101	Hydrophobicity (Zimmerman et al., 1968)	Zimmerman, J.M., Eliezer, N. and Simha, R.	The characterization of amino acid sequences in proteins by statistical methods	J. Theor. Biol. 21, 170-201 (1968)
528	ZIMJ680102	Bulkiness (Zimmerman et al., 1968)	Zimmerman, J.M., Eliezer, N. and Simha, R.	The characterization of amino acid sequences in proteins by statistical methods	J. Theor. Biol. 21, 170-201 (1968)
529	ZIMJ680103	Polarity (Zimmerman et al., 1968)	Zimmerman, J.M., Eliezer, N. and Simha, R.	The characterization of amino acid sequences in proteins by statistical methods	J. Theor. Biol. 21, 170-201 (1968)
530	ZIMJ680104	Isoelectric point (Zimmerman et al., 1968)	Zimmerman, J.M., Eliezer, N. and Simha, R.	The characterization of amino acid sequences in proteins by statistical methods	J. Theor. Biol. 21, 170-201 (1968)
531	ZIMJ680105	RF rank (Zimmerman et al., 1968)	Zimmerman, J.M., Eliezer, N. and Simha, R.	The characterization of amino acid sequences in proteins by statistical methods	J. Theor. Biol. 21, 170-201 (1968)
