# Supplementary material for: Simplified Method to Predict Mutual Interactions of Human Transcription Factors Based on Their Primary Structure
Source: PLoS One. 2011 Jul 5;6(7):e21887. doi: 10.1371/journal.pone.0021887 (PMC3130058; doi:10.1371/journal.pone.0021887)
Supplement: Table S2 — 97 features selected through feature selection. The table shows the 97 features selected through the feature selection. Column 1 contains the feature number as selected by the algorithm for feature selection. Column 2 contains the corresponding feature position in the complete feature vector of 3,186 features. Column 3 shows if the feature is representative for TF 1 or 2, which form the interaction. Column 4 shows from which respective section of the sequence the feature was extracted. Column 5 shoes the respective feature number from Table S1. (XLS) [file pone.0021887.s002.xls]

## Sheet: Sheet1
Feature	Feature position in complete feature set	TF	Section of Sequence	Feature number in Table S1
1	2418	2	middle	294
2	1480	1	end	418
3	2775	2	end	120
4	929	1	middle	398
5	1518	1	end	456
6	2105	2	start	512
7	344	1	start	344
8	520	1	start	520
9	372	1	start	372
10	2703	2	end	48
11	3085	2	end	430
12	782	1	middle	251
13	522	1	start	522
14	2071	2	start	478
15	214	1	start	214
16	1384	1	end	322
17	70	1	start	70
18	852	1	middle	321
19	2391	2	middle	267
20	2155	2	middle	31
21	1003	1	middle	472
22	1141	1	end	79
23	1775	2	start	182
24	980	1	middle	449
25	1932	2	start	339
26	1029	1	middle	498
27	1735	2	start	142
28	657	1	middle	126
29	1400	1	end	338
30	1367	1	end	305
31	2635	2	middle	511
32	727	1	middle	196
33	2098	2	start	505
34	2573	2	middle	449
35	2428	2	middle	304
36	1856	2	start	263
37	1468	1	end	406
38	3071	2	end	416
39	2069	2	start	476
40	394	1	start	394
41	2016	2	start	423
42	1131	1	end	69
43	594	1	middle	63
44	2522	2	middle	398
45	928	1	middle	397
46	1978	2	start	385
47	1568	1	end	506
48	2713	2	end	58
49	2349	2	middle	225
50	2818	2	end	163
51	1182	1	end	120
52	2656	2	end	1
53	2427	2	middle	303
54	132	1	start	132
55	2796	2	end	141
56	3142	2	end	487
57	604	1	middle	73
58	699	1	middle	168
59	1049	1	middle	518
60	1935	2	start	342
61	290	1	start	290
62	295	1	start	295
63	2554	2	middle	430
64	1134	1	end	72
65	1788	2	start	195
66	358	1	start	358
67	2459	2	middle	335
68	697	1	middle	166
69	350	1	start	350
70	3137	2	end	482
71	3161	2	end	506
72	872	1	middle	341
73	2228	2	middle	104
74	2821	2	end	166
75	814	1	middle	283
76	2739	2	end	84
77	717	1	middle	186
78	3158	2	end	503
79	2174	2	middle	50
80	91	1	start	91
81	2159	2	middle	35
82	1720	2	start	127
83	2516	2	middle	392
84	496	1	start	496
85	3093	2	end	438
86	1087	1	end	25
87	1669	2	start	76
88	1192	1	end	130
89	206	1	start	206
90	505	1	start	505
91	1648	2	start	55
92	2221	2	middle	97
93	1846	2	start	253
94	297	1	start	297
95	1293	1	end	231
96	585	1	middle	54
97	2701	2	end	46
